## **Intron retention as an excellent marker for diagnosing depression and for discovering new potential pathways for drug intervention**

Norihiro Okada<sup>a#</sup>, Kenshiro Oshima<sup>a</sup>, Akiko Maruko<sup>a</sup>, Mariko Sekine<sup>c</sup>, Naoki Ito<sup>a</sup>, Akino Wakasugi<sup>c</sup>, Eiko Mori<sup>b</sup>, Hiroshi Odaguchi<sup>b</sup> and Yoshinori Kobayashi<sup>a</sup>

<sup>a</sup>School of Pharmacy, Kitasato University, 5-9-1 Shirokane, Minato-ku, Tokyo 108-8642, Japan

<sup>b</sup>Oriental Medicine Research Center, School of Pharmacy, Kitasato University, 5-9-1 Shirokane, Minato-ku, Tokyo 108-8642, Japan

<sup>c</sup>Kitasato University Kitasato Institute Hospital, 5-9-1 Shirokane, Minato-ku, Tokyo 108-8642, Japan

#Corresponding author

## Abstract

**BACKGROUND:** Peripheral inflammation is often associated with depressive disorders, and immunological biomarkers of depression remain a focus of investigation.

**METHODS:** We performed RNA-seq analysis of RNA transcripts of human peripheral blood mononuclear cells from a case-control study including subjects with self-reported depression in the pre-symptomatic state of major depressive disorder and analyzed differentially expressed genes (DEGs) and the frequency of intron retention (IR) using rMATS.

**RESULTS:** Among the statistically significant DEGs identified, 651 upregulated and 820 downregulated genes were enriched in the Gene Ontology term ‘innate and adaptive immunity’. The upregulated DEGs were particularly enriched in the term ‘bacterial infection and phagocytosis’, whereas the downregulated DEGs were enriched in the terms ‘antigen presentation’ and ‘T-cell proliferation and maturation’. We also analyzed 158 genes for which IR was increased (IncIR) and 211 genes for which IR was decreased (DecIR) among the depressed subjects. The Gene Ontology terms associated with IncIR and DecIR were very similar to those of the up- and downregulated genes, respectively, with a preponderance of the term ‘ciliary assembly and function’ for DecIR. Moreover, the results of the network analysis also showed that a Japanese herbal medicine could partially mitigate the severity of depression among depressed patients. Inclusion of both IncIR and DecIR genes in the network analysis revealed several pathways related to the ability of patients to recover from depression.

**CONCLUSION:** Depression was found to be associated with activation of the innate immune response and relative inactivation of T-cell signaling. The DEGs we identified reflect physiological demands that are controlled at the transcriptional level, whereas the IR results reflect a more direct mechanism for monitoring protein homeostasis. Accordingly, an overall increase in IR is a stress response, and intron-retained transcripts are sensors of the physiological state of the cytoplasm. In particular, detection of increased IR in cilia-specific genes apparently correlates with defects in ciliary function or immunological synapse in depressed subjects. The results demonstrate the potential of relative IR as a biomarker for the immunological stratification of depressed patients and the utility of IR for the discovery of novel pathways involved in recovery from depression.

## Introduction

In 2017, it was estimated that more than 320 million people worldwide were affected by clinical depression (1). It is likely that this number—along with the number of people affected by other mental disorders—has since risen owing to ever-increasing stresses associated with daily life, particularly since the outbreak of COVID-19. In fact, depression has become the leading

cause of disability worldwide. Major depressive disorder (MDD) is often accompanied by anxiety disorder, and this combination is the leading cause of death by suicide (1). Currently, there is no reliable laboratory test or effective treatment strategy to diagnose or cure MDD. Another important issue in depression is the low remission rate, with approximately one-half of patients achieving complete remission; moreover the remission rate decreases with each subsequent treatment. Therefore, to better understand the pathogenesis of depression and its etiology, there is urgent need to identify biomarkers for monitoring treatment outcomes as well as genes that can be targeted for drug therapy (2, 3, 4, 5, 6).

An increasing body of evidence suggests that the incidence of peripheral inflammation correlates with that of depression (7, 8, 9, 10, 11, 12, 13, 14). Several case-control studies of MDD patients have reported elevated peripheral-blood levels of inflammatory cytokines such as C-reactive protein, interleukin 6, and tumor necrosis factor (15, 16, 17). In these cases, for which inflammation occurs first and depressive symptoms appear later, the viewpoint that inflammation contributes to depression is gaining ground. Furthermore, the prevalence of depression as a comorbidity is rather high for many inflammatory diseases that do not have a mental-health comorbidity, such as rheumatoid arthritis (18), suggesting a possible role for inflammation in depression. In his excellent book "THE INFLAMED MIND" (19), Ed Bullmore proposed that stress causes inflammation and that inflammation causes depression. Much of the current data seem to be consistent with his proposal (20).

Alternative pre-mRNA splicing is a mechanism by which multiple protein isoforms can be produced from a single gene transcript. One type of alternative splicing is termed 'intron retention' (IR), which was previously thought to simply reflect one or more errors during pre-mRNA splicing. More recently, however, IR has been considered to be a biologically meaningful phenomenon, as an increase or decrease of intron abundance among specific transcripts has been associated with certain phenomena such as cell differentiation (21, 22, 23, 24), aging (25), and oncogenesis (26). Using mouse models of aging such as Klotho mice (27) and SAMP8 mice (28), we previously showed that the frequency of IR increases in response to stress in the pre-symptomatic state and that when the state is restored by administration of a Japanese herbal medicine, the incidence of IR is restored to that of the healthy state (27, 28). In addition, we proposed that genes affected by IR (herein termed IR genes) play a sensor role in detecting perturbations in cellular homeostasis (29).

We therefore hypothesized that an analysis of IR genes could facilitate the identification of stresses experienced by patients and the possibility that dysfunctional genes may underlie their depression. In this regard, we explored the possibility that the incidence of IR could be used to investigate the etiology of depression.

## **Materials and Methods**

### **Ethics declarations, ethics approval and consent to participate**

The research plan was reviewed and approved by the Research Ethics Committee of Kitasato Institute Hospital and assigned research number 21037. The study on which this research was based was an interventional study with the following approval numbers: No. 21039 and UMIN Study ID UMIN000045707. The Kitasato Institute Hospital Research Ethics Committee deliberates in accordance with the Ethics Guidelines for Medical and Health Research Involving Human Subjects in Japan. All participants gave written consent to the research procedures, including genetic analysis.

### **Subjects**

We recruited subjects with depressive symptoms who had consented to participate in the "Study of Hangekobokuto (30) and the Intestinal Environment" conducted by the Kitasato University Oriental Medicine Research Center and who scored between 6 and 20 on the Brief Depressive Symptom Scale. After the benefits and risks of the study were explained to each subject, written informed consent was obtained. For subjects who consented, we applied the following eight exclusion criteria. 1) Subjects already receiving drug treatment for depression; 2) subjects who had taken herbal medicinal preparations within the previous 4 weeks; 3) subjects who had taken antibiotics within the previous 4 weeks; 4) subjects who were clearly in need of conventional medical treatment; 5) subjects who had been diagnosed with ulcerative colitis or Crohn's disease; 6) subjects with clinically significant hepatic or renal impairment; 7) subjects who had participated in other clinical studies within the past 12 weeks; and 8) subjects who were deemed by the investigators to be unsuitable for the study.

Each subject took a single daily dose of the Japanese herbal medicine Hangekobokuto (HKT) at home. The BDI<sup>TM</sup>-II Beck Depression Questionnaire (BDI-II) was administered at the time of initial screening and at hospital visits 2 months after taking their final dose of HKT, and blood was collected using a BD Vacutainer CPTTM Blood Collection Tube (Nippon Becton Dickinson, Japan). Subjects were classified according to their BDI-II score, with six subjects scoring less than 16 and being considered as controls (CON) and eight subjects with depression symptoms (before medical treatment, BMT, or after medical treatment, AMT) scoring 17 or higher.

### **Japanese herbal medicine**

Japanese herbal medicines originated in ancient China and are widely used in Japan for treatment of a variety of conditions (31, 32). HKT (30) is one such formulation and is taken for symptoms of anxiety, stagnant gas in the stomach, and poor digestive function. In this study, HKT

was used as a decoction in the following amounts, based on the formula of the Kitasato University Oriental Medicine Research Centre: Hange (Pinelliae Tuber) 6.0 g; Bukuryo (Hoelen) 5.0 g; Koboku (Magnoliae Cortex) 3.0 g, Shisoyo (Perillae Herba) 2.0 g; Syokyo (Zingiberis Rhizoma) 0.5 g.

### **Preparation of PBMCs, RNA extraction, RNA library preparation, and RNA sequencing (RNA-seq)**

Blood samples were centrifuged within 2 h to isolate the PBMC (peripheral blood mononuclear cell) layer. After centrifugation, PBMC samples were stored at  $-80^{\circ}\text{C}$ . RNA was extracted from individual PBMC samples. Library construction and paired-end sequencing (150 base pairs  $\times$  2) using the NovaSeq 6000 platform (Illumina) were outsourced to Azenta Life Sciences, Tokyo, Japan. RNA-seq yielded 109–148 million ( $\times$  2, paired-ends) raw reads per sample. These were then narrowed down using conventional procedures (33, 34, 35, 36).

### **Analysis of differentially expressed genes**

Using the edgeR package in R, significantly differentially expressed genes (DEGs) in patients with depression were detected by performing the likelihood ratio test. The results showed that 922 downregulated and 641 upregulated genes were significantly differentially expressed between the six CONs and eight BMTs ( $P < 0.05$  and fold-change  $> 1.2$ ). DEGs were used for GO (Gene Ontology) and KEGG (Kyoto Encyclopedia of Genes and Genomes) pathway-enrichment analysis using the DAVID website. Similarly, the same likelihood ratio test values were calculated under the same conditions between BMT and AMT to investigate the effect of HKT administration.

### **Detection of IR**

IR-containing genes were analyzed to determine their possible role in stress sensing as proposed previously (27, 28, 29). rMATS v.4.1. was used to assess the differential IR landscape embedded in the RNA-seq data. For our analysis, the parameters for the rMATS program were as follows: [--cstat 0.05 -t paired --readLength 150 --variable-read-length]. A cut-off of  $P < 0.05$  in the likelihood ratio test and an absolute difference of the IR ratio  $> 0.05$  (both used to establish statistical significance in the rMATS program) were used to call differential IR events. Similarly, the same likelihood ratio test values were calculated under the same conditions between BMT and AMT to study the effect of HKT administration.

### **Interactome analysis**

A protein-protein interaction network was generated using Cytoscape ver. 3.9.1 with StringApp

version 1.7.1. The network type "full STRING network" was selected for plotting graphs, and a confidence-score cut-off value of 0.7 was used (default values were used for all other parameters). The statistical significance of data presented in Figure 5 was established using proteins encoded by IR genes and DEGs, and protein-protein interactions were analyzed among members of each functional gene group, cilia-related genes (proteins), psychiatric disorders–relevant genes (proteins), and adaptive and innate immunity–related genes (proteins).

## **Results**

### **RNA-seq and analysis of DEGs**

The study included a group of eight subjects with depression for whom the BDI-II score ranged from 17 to 27, which reflects moderate depression. These subjects were designated as the BMT group. Six other subjects with relatively mild depression had scores ranging from 7 to 16, and these subjects served as controls (CON group). (see Figure 1A(i)(ii)). As we are all on the spectrum, we wanted to gain molecular insight into the transition from mild to moderate depression. All subjects were also screened to ensure that they had not taken any medication or been hospitalized during the 3-month period before examination (see Materials and Methods for details).

PBMC and RNA were isolated from each sample and used for RNA-seq. DEG analysis resulted in the identification of 651 upregulated and 820 downregulated genes for the BMT group compared with the CON group (Figure 1BC, Supplementary Table 1). GO enrichment analysis of the upregulated genes (Figure 1D, Supplementary Figure 1) revealed enrichment for innate immunity–related terms such as infection, phagocytosis, inflammation and adaptive immunity–related terms; the analysis of downregulated genes (Figure 1E, Supplementary Figure 2) revealed enrichment for adaptive immunity–related terms such as antigen presentation, T-cell activation, and synapse-related terms. Figure 1B shows all downregulated genes involved in T-cell activation (5 genes in Figure 1E) and all upregulated genes involved in the innate immune response (21 genes in Figure 1D), which included a large number of immunoglobulin heavy chains (37, 38), suggesting that many of the subjects had an inflammatory phenotype (37).

### **Identification of IncIR and DecIR genes in depressed subjects**

Because IR is a stress response and genes susceptible to IR are a physiological sensor ((27, 28); see later), we characterized genes for which IR was increased in depressed subjects (IncIR) and genes for which IR was decreased (DecIR), considering that such an analysis would indicate the type of stress to which the subjects had been exposed. A total of 158 IncIR and 198 DecIR genes

were identified (Figure 2AB, Supplementary Table 2), and their characteristics were first studied based on published information. As expected, many sensor or regulatory genes were represented among the protein-coding IR genes (Table 1; 45 genes). This is only half of the genes identified as sensors, regulators and modulators among the IR genes in this analysis, in which genes controlling inflammation, innate immunity and adaptive immunity were also identified. GO enrichment analysis (Figure 2CD) of IncIR revealed enrichment of terms related to the TNF signaling pathway and several terms related to innate immune response. In IncIR, the TNF signaling pathway and several terms related to innate immune response were enriched; among the DecIR genes, there was enrichment of terms related to T-cell signaling and other adaptive immune responses as well as inflammation and innate immune processes. In short, both innate and adaptive immunity were highlighted in the IR analysis, as was the case for the DEG analysis, suggesting that the IR genes mirrored the DEG genes. The important difference between the IR genes and DEG genes is that immunoglobulin genes were included in the DEG list—in fact, almost half of the upregulated genes in our RNA-seq analysis were immunoglobulin genes (see Supplementary Figure 1), but this was not true for the IR [genes (see Discussion). The reason why immunoglobulin genes were not among the IR genes is discussed later. Interestingly, the highest enrichment score among the DecIR genes was for cilium assembly, suggesting that cilia are involved in sensing depression-induced stress (see Discussion).

### **IR genes interact with genes related to the innate immune response in a statistically significant manner.**

To characterize the IR genes in more detail, we first determined the possible overlap of IR genes with immune-related genes, cilia genes, and psychiatric disease-related genes (designated PD; Figure 3AB). The 317 IR genes (Supplementary Table 2) included 32 cilia genes (Figure 3C) and 34 immune-related genes (Figure 3D). Because many IR genes listed in Table 1 are involved in innate immunity, including viral and bacterial infection, we next examined whether IR genes could specifically interact with genes involved in the innate immune response (Figure 3E). Indeed, IR genes were found to interact specifically with genes involved in innate immunity (statistically significant,  $P < 0.0234$ ). Figure 3F shows the ranking of the IR gene interactions. Among the IR genes, *STAT1* (signal transducer and activation of transcription gene 1; Table 1 (39)) had the greatest number of interactions with innate immunity genes. Notably, *STAT1* is involved in the JAK-STAT pathway (39), which contributes to both innate and adaptive immunity including inflammation (see Discussion). We also assessed interactions between IR genes and genes involved in leukocyte activation (adaptive immunity) or the immune response, revealing that *STAT1* ranked highest in each comparison (Figure 3JK).



## IR-DEG interactome

Using all the protein-coding genes of the DEGs (285 upregulated + 433 downregulated) and IR genes (129 IncIR + 172 DecIR + 8 common to both), we created a large interactome (Figure 4A). Within the large interactome, many hub genes were connected to other genes (Supplementary Table 3). The largest hub centered on *SRC* (40), one of the DEGs, which was connected to 43 genes (Figure 4B). Among the IR genes, the largest hub was *DLG4* (41), which is involved in synaptic function. The second was *STAT1*. The third and fifth were integrin genes (42, 43), and the fourth was HLA-A (44), which is involved in antigen presentation. The sixth was MYH10 (45), myosin heavy chain, having 11 links, one of which is linked to myosin light chain kinase (MYLK) (46, 47); importantly, IR of the *MYH10* transcript was restored in subjects after administration of HKT (see Discussion).

## Recovery of IR genes by administration of HKT to subjects

After 2 months of HKT administration, PBMCs were isolated from blood samples of the subjects, and RNA-seq was performed (Figure 1A). We characterized two types of IR genes for which IR was recovered after HKT administration, namely reverse V-shape recovery in Figure 5A, comprising 30 protein-coding genes and V-shape recovery in Figure 5B, comprising 34 protein-coding genes (Supplementary Table 4). Because only 17 genes (7 for the V-shape recovery and 10 for the reverse V-shape recovery) were restored among those identified as DEGs (Figure 5D), the fact that IR was recovered after HKT treatment in four times as many IR genes as DEGs suggested that IR is superior to DEGs as a marker for evaluating the efficacy of a drug in the present case.

Characterization of the 64 protein-coding genes for which IR was restored after HKT treatment (Figure 5C) revealed that inflammation-related genes were the most affected (21 genes; 37.5%), with 7 mitochondria-related and 7 cilia-related genes—each accounting for 10.9%. The anti-inflammatory effect shown here is consistent with the reported efficacy of many Japanese herbal medicines (31), including HKT (30). Interestingly, whereas HKT has been reported to have anti-inflammatory effects by restoring the activity of inducible nitric oxide synthase, IR of the mRNA of the encoding gene, *NOSIP* (48), which modulates cellular NO level, was consistently recovered by HKT treatment (Figure 5B, Table 2). The identification of three hematopoiesis genes may also indicate that inflammation and hematopoiesis are linked in a compensatory way, as inflammation consumes a large number of macrophages, which should be supplied again. Oxidative stress is common in depressed patients (49) and can lead to increased DNA damage together with



mitochondrial dysfunction (49). The restoration of these genes may be one of the hallmarks of this herbal medicine.

### **Pathways for which IR was restored by HKT can be characterized from the DEG-IR interactome**

The 64 protein-coding IR genes (Figure 5AB) and 17 DEGs (Figure 5D) for which IR was restored by HKT were overlaid on the DEG-IR interactome (shown in Figure 4) to determine whether any of these 81 genes could interact and network with each other. Ten new pathways were found (Figure 6). Protein-protein interactions in some of these pathways are known, but to our knowledge this is the first time that these pathways have been shown to be involved in restoring a physiological state. The implications of some of these pathways for the efficacy of HKT are discussed in the later section. As the IR-DEG interactome was generated independently of HKT treatment, this method offers the possibility that new pathways will be discovered when different drugs are used in similar subjects. Thus, IR-DEG interactome analysis could allow us to uncover new pathways involved in the mechanism of action of different types of drugs, including herbal medicines, and identify their commonalities and unique characteristics.

### **Discussion**

The upregulated DEGs identified for depressed patients in this study were significantly enriched in GO terms associated with innate immunity, including phagocytosis. Approximately 50% of these genes encode immunoglobulin heavy chains (Figure 1B, Supplementary Table 1). In contrast, the downregulated DEGs were enriched in GO terms associated with adaptive immunity, including antigen presentation and T-cell function. This trend in depressed patients has been reported previously (3, 4).

### **Intron fine-tuning model links IR to protein homeostasis.**

An important aspect of our study is that the data show that IR can be used as an alternative clinical means of diagnosing depression, in place of traditional DEG-based methods. Roughly speaking, GO terms enriched in IncIR genes corresponded to GO terms of upregulated DEGs, whereas GO terms enriched in DecIR genes corresponded to GO terms of downregulated DEGs. This correspondence can be better understood in the light of our recently proposed intron fine-tuning model (29). That is, an increase in IR leads to a decrease in the amount of mature cytoplasmic mRNA (and thus a decrease in cytoplasmic protein), whereas a decrease in IR leads to an increase

in mature cytoplasmic mRNA (and thus an increase in cytoplasmic protein). In other words, IR is a function that optimizes the amount of cytoplasmic protein by detecting changes in the amount of protein required in the cytoplasm due to physiological adaptations that occur in response to stress. Namely, this is the molecular mechanism by which intracellular protein homeostasis is regulated.

### **The sensor role of IR is evolutionarily conserved.**

As can be easily imagined from the model described above, genes that undergo IR have a sensor role. Indeed, in the literature describing the gene functions of many of the depression-related IR genes we identified, the article titles often include the word 'sensor' or 'regulate' (Table 1). Therefore, if an IR is observed in depressed patients for a gene whose sensor role is not reported in the literature, analysis of the IR gene may reveal a new, as yet unidentified, regulatory sensor role for the gene in clinically depressed patients.

In many cases, the IR genes we identified did not correspond to genes in the DEGs themselves. Of the 30 DEGs shown in Figure 1B, only one gene, *HLA-DRB1* (50), is actually subject to IR. DEGs often reflect quantitative aspects, whereas IR genes are more qualitative. By analogy, the DEG is the soldier, the manual worker, whereas the IR genes are the commander in chief. A typical example of the qualitative difference between DEGs and IR genes is secreted proteins, which are sometimes detected as DEGs (indeed, half of the upregulated genes we identified were immunoglobulins; Supplementary Figure 1) but not as IR genes. This is because these proteins are secreted from cells via the Golgi and are therefore not captured by the homeostasis detection mechanism in the cytoplasm (29).

Based on our previous publications (27, 28, 29), it is likely that some genes (about 10%) of the 20,000-30,000 genes in the mammalian genome are originally ASSIGNED to play a sensor role by retaining introns during stress. In budding yeast, for example, introns may play a mediator role in monitoring the physiological state of the cell (51, 52). Thus, the sensor function of IR genes is likely to be evolutionarily conserved, as described in the present study. However, the mechanisms by which IR genes sense the physiological stresses experienced by cells and contribute to homeostasis (29) remain to be elucidated.

### **IR is an excellent marker for diagnosing depressive states and is superior to DEG.**

Many researchers have analyzed DEGs between cases and controls to identify markers of depression. It has been found that even when the top 10 genes with the highest expression variability are examined, the data differ from experiment to experiment and do not agree (53). As

our current study shows, IR variation is likely to be a more sensitive marker than DEGs for the diagnosis of depression. Consider the following practical interpretation: a 10% variation in immunoglobulin levels detected by DEG does not necessarily represent the physiological state of a particular individual, but a 10% decrease in the IR of the inflammation sensor STAT1 (39) could result in a 10% increase in the amount of cytosolic STAT1 protein, thus having a significant impact on immune homeostasis. The accumulation of various studies to date suggests that the cause of depression is polygenic as an explanation for the fact that DEG data fluctuate and do not agree from experiment to experiment (54), but the failure to find a better marker gene in the DEG is not so much that depression is polygenic, likely due to the nature of the DEGs themselves.

### **Examples of markers for the diagnosis of depressive states**

So, among the genes that cause IR, are there any that are particularly likely to be common markers for depression? Depression is an immune disease. Therefore, among the IR genes we identified, the 34 genes identified as immune-related (Figure 3D) are likely to be good candidates. In addition, the expression of immune-related genes changes in response to depression, and the IR genes most likely to interact with them would likely change with depression. Therefore, IR genes with a high ranking for interaction with immune-related genes, as shown in Figure 3FJK, also have great potential as markers for depression. Hub IR genes with many connections in the interactome (Figure 4B), which we discussed earlier, are also good candidates.

In terms of common markers of depression, a particular highlight of the present study is the detection of a number of cilia-related genes (32 genes; Figure 3C) as IR genes. This may reflect the functional stress state of cilia as antennae in leukocyte cells, although the presence of cilia on leukocyte cells is controversial (55). It is known that when dendritic cells present antigens to T cells, these two types of cells form structures known as immunological synapses, in which the internal structure of the T cell resembles that of cilia (56, 57, 58). Therefore, the observation of IR in ciliary genes may represent a failure of T cells to recognize antigens during depression. This interpretation is consistent with the observations that several T cell activation genes were downregulated (Figure 1E) and that those involved in the T cell signaling pathway were characterized as DecIR genes (Figure 2D).

Of the 1117 cilia genes currently known, IR was observed in 32 genes in this study (Figure 3C). Surprisingly, of the 37 cilia-specific genes currently known to cause Joubert syndrome, six (AHI1 (59), CELSR2 (60), CEP104 (61), IFT172 (62), NPHP1 (63), TMEM107 (64)) were found to be among the IR genes. In addition, IR was restored for four of these six genes in response to treatment with HKT (Figure 5AB). Thus, the Joubert syndrome genes appear to be frequently IR and highly responsive to HKT, suggesting that these genes are the best candidates for marker

genes for depression. *AHI1* and *NPHP1* were also found to be involved in pathways for recovery, as described below (see Figures 5 and 6). Future clinical studies are awaited to confirm these possibilities, where it will be necessary to determine more reads during sequencing, assuming rMATS is used (rMATS requires approximately five times more sequencing reads than DEGs).

### Ten characteristic pathways represented by efficacies of HKT

Mapping of HKT-responsive IR genes and DEGs onto the IR-DEG interactome revealed 10 pathways for which IR of certain genes was recovered in concert with that of other genes. Although each of these 10 pathways deserves detailed investigation (most of them were newly discovered in this study), it is important to emphasize that, in each of these 10 pathways, changes in IR of one gene were linked to changes in IR or DEGs, forming a single functional unit (which we call a gear). We will discuss a few of these. The first is the *NPHP1-AHI1* pathway (Figure 6G). As mentioned above, these two genes are involved in cilia function, and mutations cause a ciliopathy called Joubert syndrome (59, 65, 66, 67). A yeast two-hybrid analysis revealed that jouberin (encoded by *AHI1*) can interact with nephrocystin (encoded by *NPHP1*) (68). The two proteins form a heterodimer, and a mutation in *AHI1* (V443D) that prevents heterodimer formation alters the intracellular localization of *AHI1* and *NPHP1* so that the two proteins can, although not always, behave as if they were one protein (59). It is interesting to note that the IR of these two mRNAs is reduced in depression and that IR of both mRNAs was returned to that of the healthy state in response to treatment with HKT (Figure 6G). In other words, the mRNAs transcribed from these two genes seem to be under the same control mechanism of RNA processing, as if they were the same mRNA. These observations remind us of a model we recently proposed, i.e., a novel mechanism may exist that senses the correct level of functional proteins in the cytoplasm and transmits this information to the nucleus to regulate the level of IR (29). If such a mechanism exists, it would mean that IR in of *AHI1* and *NPHP1* is regulated by a common factor.

In the case of the *MYLK-MYH10* pathway (Figure 6I), inflammatory inputs activate *MYLK* and phosphorylate the L-chain of myosin (47). This causes the contracted L-chain of myosin to transmit information to the H-chain, which in turn regulates the copy number of mitochondrial DNA, which is tightly bound to the non-muscle H-chain (45). In this biological GEAR, the input is inflammation and the output is the control of the number of copies of mitochondrial DNA. The GEAR function in these ten pathways, including the two already postulated, need to be demonstrated biochemically, but brief outlines of the hypothetical pathways are given in the legend of Figure 6.

Figure 6K shows the mapping of the 10 pathways for which IR was restored by HKT on the

IR-DEG interactome described in this study. This interactome was generated using data from depressed patients and controls only. Thus, if a drug other than HKT (i.e., with a different effect) was used, new pathways restored by the drug could be detected. Accordingly, this IR-DEG interactome should be useful for assessing the efficacy of individual drugs, including herbal medicines, and for identifying new pathways affected by drugs.

In summary, our results show that IR can be an excellent marker of depression. The combination of network analysis and analysis of drug-responsive IR genes may also reveal new pathways of drug action. The strategy presented here is not limited to the analysis of depression, but rather could be applied to any disease.

#### Authors' Contributions

Norihiro Okada conceived, supervised and validated the IR project and wrote and finalized the manuscript. Kenshiro Oshima analyzed and visualized the data and wrote the Materials and Methods and legends. Akiko Maruko analyzed the PCR data. Mariko Sekine suggested the application of the IR method to human subjects. Naoki Ito isolated PBMCs. Akino Wakasugi analyzed the human data. Eiko Mori and Hiroshi Odaguchi designed and performed the clinical research. Yoshinori Kobayashi organized the human COI project to investigate the effectiveness of herbal medicine. All authors read, revised, edited, and approved the final manuscript.

#### Competing interests

N.O., K.O. and A.M. received a research grant from Tsumura and CO. Although Tsumura is a manufacturer of the Japanese herbal medicine, the company did not provide the HKT used in this study, which was prepared at the Kitasato University Oriental Medicine Research Center. All research members of this study declare no potential conflicts of interest.

#### Figure legends

**Fig. 1. Comparison of RNA expression between depressed subjects and less depressed controls.** (A) (i) Subject information. Classification was based on the BDI-II score at first examination. Subjects with BDI-II score  $< 16$  were categorized as less depressed (controls, CON), and those with BDI-II score  $\geq 16$  were categorized as depressed. BMT, depressed subjects before medical treatment; AMT, depressed subjects after 2 months of taking HKT. (ii) Mean and standard deviation of sex, age, and BDI-II score for each group. (B) Volcano plot of RNA expression

between the BMT and CON groups. The horizontal axis shows the log<sub>2</sub> fold-change of BMT/CON, and the vertical axis shows  $-\log_{10}$  P-values. Red dots denote significantly upregulated genes (FC (fold change) > 1.2 and P < 0.05), blue dots denote significantly downregulated genes (FC > 1/1.2 and P < 0.05), and grey dots indicate no significant difference in expression (likelihood ratio test). Gene symbols for T cell-associated genes are indicated. (C) Heatmap of significantly differentially expressed genes between BMT and CON subjects. (D, E) Enrichment analysis of biological processes among Gene Ontology and KEGG pathway terms for the 641 upregulated (D) or 922 downregulated (E) genes in the BMT group. The horizontal axis shows  $-\log_{10}$  P-values. Green bars indicate Gene Ontology biological process terms, and yellow bars indicate KEGG pathway terms.

**Fig. 2. Identification and characterization of IR genes.** (A) Number of IR genes with significantly increased IR (IncIR) or decreased IR (DecIR) for BMT versus CON using rMATS software v.4.1.1. The statistical significance of differences between values was based on a P-value of <0.05 and a difference in intron ratio of >0.05. (B) Heatmap of significantly different IR loci between BMT and CON. (C, D) Enrichment analysis of biological processes among Gene Ontology and KEGG pathway terms using 158 IncIR genes (C) and 198 DecIR genes (D) in the BMT group. Gene symbols corresponding to the terms are shown on the right. The horizontal axis shows  $-\log_{10}$  P-values. Green bars indicate Gene Ontology biological process terms, and yellow bars indicate KEGG pathway terms.

**Fig. 3. IR loci interact preferentially with genes involved in innate immunity.** (A) Number of IR genes and IR protein-coding genes. (B) Venn diagram between IR genes, cilia-related genes (GO: 0060271 cilium assembly + SCGSv2 ciliary genes (69)), adaptive and innate immunity-related genes (GO: 0046649 lymphocyte activation and GO: 0006955 immune response), and psychiatric disorders-relevant (PD) genes. The PD gene set was constructed by merging genes from the following databases or previous studies: SFARI (autism-related gene database, <https://www.sfari.org/resource/sfari-gene/>); PsyGeNET (mental disorder-related gene database, <https://www.sfari.org/resource/sfari-gene/>); PD genes (70); major depression risk genes (71). (C) Gene symbols shared between IR and cilia-related genes, corresponding to the area outlined in red in B. Groups were classified as IncIR, DecIR or Mixed ('Mixed' indicates a gene for which one intron was classified as IncIR and another classified as DecIR). (D) Gene symbols shared between IR and immunity-related genes, corresponding to the area outlined by blue in B. (E) Network showing significant protein-protein interactions (PPI) between proteins encoded by IR genes and those encoded by innate immune response-related genes. The

interaction score was calculated using the full STRING network confidence score 0.7 from the STRING database. (Left) Network of PPIs between proteins encoded by IR genes and innate immune response genes (GO: 0045087). Innate immune-response proteins were placed in the central circle and IR proteins (red: IncIR, blue: DecIR, green: Mixed) on either side. (Right) Instead of IR proteins, equal numbers of randomly selected gene sets were placed on both sides. Ranking table shows the top 30 proteins with the greatest number of interactions (number of links) with the IR genes in (F) and with 5 randomly selected protein sets in (G). (H) Comparison of the average number of interactions (number of links) with innate immune-response proteins among the IR genes and 5 random protein sets. (I) Comparison of the average number of interactions (number of links) with innate immune-response proteins of genes classified as IncIR or DecIR. (J) Ranking table showing the top 30 proteins with the greatest number of interactions (links) to lymphocyte-activation proteins (GO: 0046649) among the IR proteins. (K) Ranking table showing the top 30 proteins with the greatest number of interactions (links) to immune-response proteins (GO: 0006955) among the IR proteins.

**Fig. 4. PPI network of IR and DEG proteins.** (A) Main network showing PPIs using all IR and DEG proteins between BMT and CON. The interaction score was calculated using the full STRING network confidence score 0.7 from the STRING database. IncIR: red circles, DecIR: blue circles, Mixed: green circles. Upregulation: small circle with red border, downregulation: small circle with blue border. Only the largest networks are shown, as singletons and smaller networks were excluded. IR protein names are shown. Inset, bottom-right: (A square bottom right) Proteins with  $\geq 10$  interactions (number of links) are marked with symbols. (B) Ranking table of protein names with 10 or more interactions. (C–E) Proteins corresponding to cilia (brown, GO: 0060271 cilium assembly) in (C), lymphocyte activation (purple, GO: 0046649 lymphocyte activation) in (D), and innate immunity (light green, GO: 0045087 innate immune response) in (E) are colored as in the network in panel A.

**Fig. 5. Recovery of IR by administration of HKT.** (A) (Top, left) Venn diagram of intronic loci that were significantly increased (IncIR between BMT and CON) and those that were decreased (DecIR between BMT and AMT) by HKT treatment. (Bottom, left) Gene symbols with recovered loci are shown (protein-coding genes are shown in bold). (Right) Box plot showing average intron ratio at recovered loci. (B) (Top, left) Venn diagram of intronic loci that were significantly decreased (DecIR between BMT and CON) and those that were increased (IncIR between BMT and AMT) by HKT treatment. (Bottom, right) Gene symbols with recovered loci are shown (protein-coding genes are shown in bold). (C) Table of functional categorization from the literature of the recovered IR genes.



**Fig. 6. New pathways restored by HKT overlaid on the PPI network.** (A–J) The network was extracted from the PPI network and then overlaid with the recovered IR and DEG loci. All recovered IR loci except *PLD2* showed a significant difference ( $P < 0.05$ ,  $FC > 1.2$ ) between BMT and CON and between BMT and AMT. All DEG loci showed a significant difference ( $P < 0.05$ ,  $FC > 1.2$ ) between BMT and CON, but their significance between BMT and AMT was marginal ( $P < 0.3$ ; likelihood ratio test). Each IR gene is indicated by a large circle, where blue indicates DecIR and red IncIR. DEGs are indicated by a small circle, where blue indicates downregulation and red indicates upregulation. Intron ratio for IR and gene expression levels for DEGs. In the bar graph, asterisks indicate statistically significant differences (\* $p < 0.05$ , \*\* $p < 0.01$ , \*\*\* $p < 0.001$ , NS: not significant). (A) The pathway involving *NDUFA5*, *FOXRED1*, *NDUFV2* and *ATP5MGL* (72) regulates mitochondrial function. (B) The *TP73* (73) - *FAS* (74) - *CAVI* (75, 76) - *PDGFRA* (77) pathway is involved in inflammatory signaling. (C) The *CAVI* (75, 76) - *PLD2* (78) - *NAPEPLD* (79, 80) signaling pathway is involved in the regulation of lipid metabolism involving caveolae as a vital plasma-membrane sensor. (D) The *DDX5* (81, 82) - *ZWINT* (83) - *UBE2T* (84) pathway is involved in the amplification by ubiquitination of an inflammatory signal taken up by *DDX5* via the immune infiltration stimulated by *ZWINT*. (E) The *CERT1* (85) - *COL4A3* (86) - *ITGA9* (87) pathway is involved in anti-inflammatory responses. (F) The *HOXA1* (88) - *ROBO3* (89) - *NTN1* (90) signaling pathway regulates inflammation. (G) See text. (H) The *SMARCD2* (91, 92) - *BRD9* (93, 94) signaling pathway mediates inflammatory input activated by *BRD9*, thereby mediating granulopoiesis as an output through activation of *SMARCD2*. (I) See text. (J) The *EOGT* (95) - *DOCK6* (96) pathway regulates hematopoiesis. (K) In the main network, each position of the pathways (A–H) is indicated by a red outline.

**Table 1. Sensor and regulatory genes that were identified from among the protein-coding IR genes**

| Category | Gene          | Function                        | Ref.  |
|----------|---------------|---------------------------------|-------|
| Sensor   | <i>ADGRB2</i> | Metabotropic mechanosensor      | (123) |
|          | <i>AIF1</i>   | Innate response sensor          | (124) |
|          | <i>CD163</i>  | Macrophage innate immune sensor | (125) |
|          | <i>DDX5</i>   | Interferon antiviral sensor     | (126) |
|          | <i>DDX3X</i>  | Interferon antiviral sensor     | (126) |

|           |                                  |                                                             |       |
|-----------|----------------------------------|-------------------------------------------------------------|-------|
|           | <i>ERLIN1</i>                    | Innate immune sensor                                        | (127) |
|           | <i>GBF1</i>                      | ER_sensor                                                   | (102) |
|           | <i>HTRA2</i>                     | Mitochondria stress sensor                                  | (128) |
|           | <i>LRSAM1</i>                    | Bacterial sensor                                            | (129) |
|           | <i>MAP3K12</i><br>( <i>DLK</i> ) | axon-damage sensor                                          | (130) |
|           | <i>MOK (RAGE)</i>                | Heme sensor                                                 | (131) |
|           | <i>NDRG2</i>                     | Inflammation sensor                                         | (115) |
|           | <i>NFATC4</i>                    | Nerve sensor                                                | (116) |
|           | <i>OAS2</i>                      | Viral sensor                                                | (117) |
|           | <i>PQBP1</i>                     | HIV innate response sensor                                  | (132) |
|           | <i>SARM1</i>                     | Metabolic sensor                                            | (133) |
|           | <i>SLC9A5 (NHE5)</i>             | PH sensor                                                   | (134) |
|           | <i>SLC16A11</i>                  | Glucose lipid sensor                                        | (135) |
|           | <i>ZNF598</i>                    | Collided_ribosome sensor                                    | (136) |
| Regulator | <i>ADCY4</i>                     | Controls caspase-11 inflammasome activation                 | (107) |
|           | <i>BRD9</i>                      | Regulates interferon-stimulated genes                       | (93)  |
|           | <i>BTBD3</i>                     | Controls dendrite orientation                               | (137) |
|           | <i>BTN3A3</i>                    | Regulates ERK1/2 phosphorylation                            | (138) |
|           | <i>CACNB3</i>                    | Regulates ATP-dependent migration of dendritic cells        | (139) |
|           | <i>CFB</i>                       | Regulates cellular senescence                               | (140) |
|           | <i>CLK4</i>                      | Regulates DNA damage induced NF-kB                          | (141) |
|           | <i>HAGHL</i>                     | Regulates human colorectal cancer progression               | (142) |
|           | <i>ITGAL</i>                     | Regulates glioma growth                                     | (143) |
|           | <i>MAT2B</i>                     | Regulates EGFR signaling pathway                            | (144) |
|           | <i>Mettl17</i>                   | Regulates mitochondrial ribosomal RNA modifications         | (145) |
|           | <i>MICAL1</i>                    | Regulates actin microfilaments                              | (146) |
|           | <i>MSH5</i>                      | Regulates Ig class switch recombination                     | (147) |
|           | <i>MYO1G</i>                     | Regulates exocytosis, and endocytosis in B lymphocytes      | (148) |
|           | <i>MYSM1</i>                     | Regulates hematopoietic stem cell maintenance               | (149) |
|           | <i>NAPEPLD</i>                   | Regulates liver lipid metabolism                            | (79)  |
|           | <i>PGM3</i>                      | Regulates beta-catenin activity                             | (150) |
|           | <i>PLD2</i>                      | Regulates phagocyte cell migration                          | (151) |
|           | <i>PTPN18</i>                    | Regulates the c-MYC-CDK4 axis                               | (152) |
|           | <i>ROBO3</i>                     | Modulates prognosis via AXL-associated inflammatory network | (89)  |

|               |                                                            |       |
|---------------|------------------------------------------------------------|-------|
| <i>SCFD1</i>  | Regulates SNARE complex formation                          | (153) |
| <i>SNAP23</i> | Regulates phagocytosis                                     | (154) |
| <i>STARD9</i> | Regulates Spindle Pole Assembly                            | (155) |
| <i>STAT1</i>  | Regulates transcription in the interferon JAK-STAT pathway | (39)  |
| <i>TRA2A</i>  | Regulates EZH2/beta-catenin pathway                        | (156) |
| <i>UBE2T</i>  | Promotes autophagy                                         | (121) |

**Table 2. Functional categorization of recovery IR genes.**

| Functional category       | Gene           | IR V-shape | IR reverse V | Description                                                                                                                                                              | Ref.  |
|---------------------------|----------------|------------|--------------|--------------------------------------------------------------------------------------------------------------------------------------------------------------------------|-------|
| DNA repair, Recombination | <i>PMS2</i>    |            | ✓            | Elevated levels of mutation in multiple tissues of mice deficient in the DNA mismatch repair gene <i>Pms2</i>                                                            | (99)  |
|                           | <i>REC8</i>    |            | ✓            | Meiotic prophase roles of <i>Rec8</i> in crossover recombination and chromosome structure                                                                                | (100) |
| Erythropoiesis            | <i>CDIN1</i>   |            | ✓            | The congenital dyserythroipoietic anemias: genetics and pathophysiology                                                                                                  | (97)  |
|                           | <i>EOGT</i>    |            | ✓            | Synergistic regulation of Notch signaling by different O-glycans promotes hematopoiesis                                                                                  | (95)  |
|                           | <i>SMARCD2</i> | ✓          |              | A <i>SMARCD2</i> -containing m SWI/ SNF complex is required for granulopoiesis                                                                                           | (98)  |
| Cilia                     | <i>AH11</i>    | ✓          |              | <i>AH11</i> , whose human ortholog is mutated in Joubert syndrome, is required for Rab8a localization, ciliogenesis and vesicle trafficking                              | (59)  |
|                           | <i>CELSR2</i>  |            | ✓            | <i>CELSR2</i> , Encoding a Planar Cell Polarity Protein, is a Putative Gene in Joubert Syndrome with Cortical Heterotopia, Microphthalmia, and Growth Hormone Deficiency | (60)  |
|                           | <i>CEP104</i>  | ✓          |              | Joubert Syndrome in French Canadians and Identification of Mutations in <i>CEP104</i>                                                                                    | (61)  |
|                           | <i>DNHD1</i>   | ✓          |              | Bi-allelic variants in <i>DNHD1</i> cause flagellar axoneme defects and asthenoteratozoospermia in humans and mice                                                       | (101) |
|                           | <i>GBF1</i>    |            | ✓            | The Arf GEF <i>GBF1</i> and ARF4 synergize with the sensory receptor cargo, rhodopsin, to regulate ciliary membrane trafficking                                          | (102) |

|                     |                |   |   |                                                                                                                                                                  |       |
|---------------------|----------------|---|---|------------------------------------------------------------------------------------------------------------------------------------------------------------------|-------|
|                     | <i>NAPEPLD</i> | ✓ |   | Small Molecule Activation of NAPE-PLD Enhances Efferocytosis by Macrophages                                                                                      | (80)  |
|                     | <i>NPHP1</i>   | ✓ |   | Many Genes—One Disease? Genetics of Nephronophthisis (NPHP) and NPHP-Associated Disorders                                                                        | (67)  |
| <b>Mitochondria</b> | <i>FOXRED1</i> | ✓ |   | Characterization of mitochondrial <i>FOXRED1</i> in the assembly of respiratory chain complex I                                                                  | (72)  |
|                     | <i>MFN2</i>    | ✓ |   | Mitofusin 2 ( <i>MFN2</i> ) links mitochondrial and endoplasmic reticulum function with insulin signaling and is essential for normal glucose homeostasis        | (103) |
|                     | <i>MYH10</i>   |   | ✓ | Actin and myosin contribute to mammalian mitochondrial DNA maintenance                                                                                           | (45)  |
|                     | <i>NDUFA5</i>  | ✓ |   | Supernumerary subunits <i>NDUFA3</i> , <i>NDUFA5</i> and <i>NDUFA12</i> are required for the formation of the extramembrane arm of human mitochondrial complex I | (72)  |
|                     | <i>SIGMAR1</i> | ✓ |   | The role of <i>SIGMAR1</i> gene mutation and mitochondrial dysfunction in amyotrophic lateral sclerosis                                                          | (104) |
|                     | <i>SPG7</i>    | ✓ |   | <i>SPG7</i> Is an Essential and Conserved Component of the Mitochondrial Permeability Transition Pore                                                            | (105) |
|                     | <i>TEFM</i>    |   | ✓ | <i>TEFM</i> (c17orf42) is necessary for transcription of human mtDNA                                                                                             | (106) |
| <b>Inflammation</b> | <i>ADCY4</i>   |   | ✓ | cAMP metabolism controls caspase-11 inflammasome activation and pyroptosis in sepsis                                                                             | (107) |
|                     | <i>BRD9</i>    |   | ✓ | Bromodomain containing 9 (BRD9) regulates macrophage inflammatory responses by potentiating glucocorticoid receptor activity                                     | (93)  |
|                     | <i>CDCA3</i>   |   | ✓ | <i>CDCA3</i> promotes cell proliferation by activating the NF- $\kappa$ B/cyclin D1 signaling pathway in colorectal cancer                                       | (108) |
|                     | <i>CERT1</i>   |   | ✓ | Ceramides as Mediators of Oxidative Stress and Inflammation in Cardiometabolic Disease                                                                           | (85)  |
|                     | <i>CXCL2</i>   |   | ✓ | NF- $\kappa$ B and <i>STAT1</i> control <i>CXCL1</i> and <i>CXCL2</i> gene transcription                                                                         | (109) |
|                     | <i>DDX5</i>    | ✓ |   | IL-17D-induced inhibition of <i>DDX5</i> expression in keratinocytes amplifies IL-36R-mediated skin inflammation                                                 | (110) |
|                     | <i>ERLIN1</i>  | ✓ |   | The <i>ERLIN1-CHUK-CWF19L1</i> gene cluster influences liver fat deposition and hepatic inflammation in the NHLBI Family Heart Study                             | (111) |

|  |                |   |   |                                                                                                                                                                                                                                            |       |
|--|----------------|---|---|--------------------------------------------------------------------------------------------------------------------------------------------------------------------------------------------------------------------------------------------|-------|
|  | <i>FAS</i>     |   | ✓ | The Many Roles of <i>FAS</i> Receptor Signaling in the Immune System                                                                                                                                                                       | (112) |
|  | <i>IL17RB</i>  |   | ✓ | Cutting Edge: IL-17B Uses IL-17RA and IL-17RB to Induce Type 2 inflammation from Human Lymphocytes                                                                                                                                         | (113) |
|  | <i>MYLK</i>    |   | ✓ | Myosin Light Chain Kinase: A Potential Target for Treatment of Inflammatory Diseases                                                                                                                                                       | (47)  |
|  | <i>NCSTN</i>   | ✓ |   | Keratin 5-Cre-driven deletion of <i>NCSTN</i> in an acne inversa-like mouse model leads to a markedly increased IL-36a and <i>SPRR2</i> expression                                                                                         | (114) |
|  | <i>NDRG2</i>   | ✓ |   | Association between <i>NDRG2/IL-6/STAT3</i> signaling pathway and diabetic retinopathy in rats                                                                                                                                             | (115) |
|  | <i>NFATC4</i>  | ✓ |   | <i>NFAT</i> is a nerve activity sensor in skeletal muscle and controls activity-dependent myosin switching                                                                                                                                 | (116) |
|  | <i>NOSIP</i>   | ✓ |   | <a href="#">NOSIP, a novel modulator of endothelial nitric oxide synthase activity</a>                                                                                                                                                     | (44)  |
|  | <i>OAS2</i>    | ✓ |   | <i>OAS1</i> , <i>OAS2</i> , and <i>OAS3</i> Contribute to Epidermal Keratinocyte Proliferation by Regulating Cell Cycle and Augmenting IFN-1- induced Jak1-Signal Transducer and Activator of Transcription 1 Phosphorylation in Psoriasis | (117) |
|  | <i>PRMT7</i>   | ✓ |   | The Role of Protein Arginine Methyltransferases in Inflammatory Responses                                                                                                                                                                  | (118) |
|  | <i>ROBO3</i>   | ✓ |   | Axon guidance receptor <i>ROBO3</i> modulates subtype identity and prognosis via AXL-associated inflammatory network in pancreatic cancer                                                                                                  | (89)  |
|  | <i>SLC22A5</i> | ✓ |   | Characterisation of exosomal <i>SLC22A5 (OCTN2)</i> carnitine transporter                                                                                                                                                                  | (119) |
|  | <i>TRIM16</i>  |   | ✓ | <i>TRIM16</i> exerts protective function on myocardial ischemia/reperfusion injury through reducing pyroptosis and inflammation via NLRP3 signaling                                                                                        | (120) |
|  | <i>UBE2T</i>   | ✓ |   | Correlations between UBE2T Expression and Immune Infiltration in Different Cancers                                                                                                                                                         | (121) |
|  | <i>USP21</i>   | ✓ |   | <i>USP21</i> Deubiquitinase Regulates AIM2 Inflammasome Activation                                                                                                                                                                         | (122) |

## References

1. (2017): Global health estimates: Depression and other common mental disorders. Geneva:

World Health Organization.

2. Drevets WC, Wittenberg GM, Bullmore ET, Manji HK (2022): Immune targets for therapeutic development in depression: towards precision medicine. *Nature Reviews Drug Discovery* 21, 224-244.
3. Leday GGR, Vertes PE, Richardson S, Greene JR, Regan T, Khan S et al. (2018): Replicable and Coupled Changes in Innate and Adaptive Immune Gene Expression in Two Case-Control Studies of Blood Microarrays in Major Depressive Disorder. *Biol Psychiatry* 83, 70-80.
4. Leonard BE (2010): The concept of depression as a dysfunction of the immune system. *Curr Immunol Rev* 6, 205-212.
5. Nobis A, Zalewski D, Waszkiewicz N (2020): Peripheral Markers of Depression. *J Clin Med* 9.
6. Sullivan PF, Geschwind DH (2019): Defining the Genetic, Genomic, Cellular, and Diagnostic Architectures of Psychiatric Disorders. *Cell* 177, 162-183.
7. Beurel E, Toups M, Nemeroff CB (2020): The Bidirectional Relationship of Depression and Inflammation: Double Trouble. *Neuron* 107, 234-256.
8. Chamberlain SR, Cavanagh J, de Boer P, Mondelli V, Jones DNC, Drevets WC et al. (2019): Treatment-resistant depression and peripheral C-reactive protein. *Br J Psychiatry* 214, 11-19.
9. Dantzer R, O'Connor JC, Freund GG, Johnson RW, Kelley KW (2008): From inflammation to sickness and depression: when the immune system subjugates the brain. *Nat Rev Neurosci* 9, 46-56.
10. Grosse L, Carvalho LA, Wijkhuijs AJ, Bellingrath S, Ruland T, Ambree O et al. (2015): Clinical characteristics of inflammation-associated depression: Monocyte gene expression is age-related in major depressive disorder. *Brain Behav Immun* 44, 48-56.
11. Grosse L, Hoogenboezem T, Ambree O, Bellingrath S, Jorgens S, de Wit HJ et al. (2016): Deficiencies of the T and natural killer cell system in major depressive disorder: T regulatory cell defects are associated with inflammatory monocyte activation. *Brain Behav Immun* 54, 38-44.
12. Lynall ME, Turner L, Bhatti J, Cavanagh J, de Boer P, Mondelli V et al. (2020): Peripheral Blood Cell-Stratified Subgroups of Inflamed Depression. *Biol Psychiatry* 88, 185-196.
13. Snijders G, Schiweck C, Mesman E, Grosse L, De Wit H, Nolen WA et al. (2016): A dynamic course of T cell defects in individuals at risk for mood disorders. *Brain Behav Immun* 58, 11-17.
14. Syed SA, Beurel E, Loewenstein DA, Lowell JA, Craighead WE, Dunlop BW et al. (2018): Defective Inflammatory Pathways in Never-Treated Depressed Patients Are Associated with Poor Treatment Response. *Neuron* 99, 914-924 e913.
15. Haapakoski R, Mathieu J, Ebmeier KP, Alenius H, Kivimaki M (2015): Cumulative meta-analysis of interleukins 6 and 1beta, tumour necrosis factor alpha and C-reactive protein in

patients with major depressive disorder. *Brain Behav Immun* 49, 206-215.

16. Khandaker GM, Pearson RM, Zammit S, Lewis G, Jones PB (2014): Association of serum interleukin 6 and C-reactive protein in childhood with depression and psychosis in young adult life: a population-based longitudinal study. *JAMA Psychiatry* 71, 1121-1128.

17. Miller AH, Maletic V, Raison CL (2009): Inflammation and its discontents: the role of cytokines in the pathophysiology of major depression. *Biol Psychiatry* 65, 732-741.

18. Matcham F, Rayner L, Steer S, Hotopf M (2013): The prevalence of depression in rheumatoid arthritis: a systematic review and meta-analysis. *Rheumatology (Oxford)* 52, 2136-2148.

19. Bullmore E (2018) *The inflamed mind: A radical new approach to depression*, The inflamed mind: A radical new approach to depression. New York, NY, US: Picador.

20. Chan KL, Poller WC, Swirski FK, Russo SJ (2023): Central regulation of stress-evoked peripheral immune responses. *Nat Rev Neurosci* 24, 591-604.

21. Naro C, Jolly A, Di Persio S, Bielli P, Setterblad N, Alberdi AJ et al. (2017): An Orchestrated Intron Retention Program in Meiosis Controls Timely Usage of Transcripts during Germ Cell Differentiation. *Dev Cell* 41, 82-93 e84.

22. Pimentel H, Parra M, Gee SL, Mohandas N, Pachter L, Conboy JG (2016): A dynamic intron retention program enriched in RNA processing genes regulates gene expression during terminal erythropoiesis. *Nucleic Acids Res* 44, 838-851.

23. Ullrich S, Guigo R (2020): Dynamic changes in intron retention are tightly associated with regulation of splicing factors and proliferative activity during B-cell development. *Nucleic Acids Res* 48, 1327-1340.

24. Wong JJ, Ritchie W, Ebner OA, Selbach M, Wong JW, Huang Y et al. (2013): Orchestrated intron retention regulates normal granulocyte differentiation. *Cell* 154, 583-595.

25. Adusumalli S, Ngian ZK, Lin WQ, Benoukraf T, Ong CT (2019): Increased intron retention is a post-transcriptional signature associated with progressive aging and Alzheimer's disease. *Aging Cell* 18, e12928.

26. Dvinge H, Bradley RK (2015): Widespread intron retention diversifies most cancer transcriptomes. *Genome Med* 7, 45.

27. Okada N, Oshima K, Iwasaki Y, Maruko A, Matsumura K, Iioka E et al. (2021): Intron retention as a new pre-symptomatic marker of aging and its recovery to the normal state by a traditional Japanese multi-herbal medicine. *Gene* 794, 145752.

28. Vu T-D, Ito N, Oshima K, Maruko A, Nishi A, Mizoguchi K et al. (2022): Intron retention is a stress response in sensor genes and is restored by Japanese herbal medicines: A basis for future clinical applications. *Gene* 830, 146496.

29. Okada N, Oshima K, Maruko A, Vu T-D, Chiu M-T, Nishiyama M et al. (2023): A potential pathway that links intron retention with the physiological recovery by a Japanese herbal medicine.



bioRxiv, 2023.2012.2002.569734.

30. Endo M, Oikawa T, Tonooka M, Hanawa T, Odaguchi H, Hori M (2022): Hangekobokuto, a traditional Japanese herbal medicine, ameliorates postoperative ileus through its anti-inflammatory action. *J Smooth Muscle Res* 58, 78-88.
31. Nishi A, Kaifuchi N, Shimobori C, Ohbuchi K, Iizuka S, Sugiyama A et al. (2021): Effects of maoto (ma-huang-tang) on host lipid mediator and transcriptome signature in influenza virus infection. *Sci Rep* 11, 4232.
32. Yamamoto M (2022): KAMPOMics: A framework for multidisciplinary and comprehensive research on Japanese traditional medicine. *Gene* 831, 146555.
33. Bolger AM, Lohse M, Usadel B (2014): Trimmomatic: a flexible trimmer for Illumina sequence data. *Bioinformatics (Oxford, England)* 30, 2114-2120.
34. Kim D, Paggi JM, Park C, Bennett C, Salzberg SL (2019): Graph-based genome alignment and genotyping with HISAT2 and HISAT-genotype. *Nature Biotechnology* 37, 907-915.
35. Langmead B, Salzberg SL (2012): Fast gapped-read alignment with Bowtie 2. *Nature Methods* 9, 357-359.
36. Martin M (2011): Cutadapt removes adapter sequences from high-throughput sequencing reads. *2011* 17, 3.
37. Frezza D, DiCarlo E, Hale C, Ramirez D, Mehta B, Slater D et al. (2023): Computer Vision Analysis of Rheumatoid Arthritis Synovium Reveals Lymphocytic Inflammation Is Associated With Immunoglobulin Skewing in Blood. *Arthritis Rheumatol* 75, 2137-2147.
38. Woof JM, Kerr MA (2006): The function of immunoglobulin A in immunity. *J Pathol* 208, 270-282.
39. Au-Yeung N, Mandhana R, Horvath CM (2013): Transcriptional regulation by STAT1 and STAT2 in the interferon JAK-STAT pathway. *JAKSTAT* 2, e23931.
40. Lowell CA (2004): Src-family kinases: rheostats of immune cell signaling. *Mol Immunol* 41, 631-643.
41. Cheng MC, Lu CL, Luu SU, Tsai HM, Hsu SH, Chen TT et al. (2010): Genetic and functional analysis of the DLG4 gene encoding the post-synaptic density protein 95 in schizophrenia. *PLoS One* 5, e15107.
42. Wang MS, Hu Y, Sanchez EE, Xie X, Roy NH, de Jesus M et al. (2022): Mechanically active integrins target lytic secretion at the immune synapse to facilitate cellular cytotoxicity. *Nat Commun* 13, 3222.
43. Xu S, Jiang C, Liu H, Zhang H, Liao H, Wang X et al. (2020): Integrin- $\alpha$ 9 and Its Corresponding Ligands Play Regulatory Roles in Chronic Periodontitis. *Inflammation* 43, 1488-1497.
44. Crux NB, Elahi S (2017): Human Leukocyte Antigen (HLA) and Immune Regulation: How

Do Classical and Non-Classical HLA Alleles Modulate Immune Response to Human Immunodeficiency Virus and Hepatitis C Virus Infections? *Front Immunol* 8, 832.

45. Reyes A, He J, Mao CC, Bailey LJ, Di Re M, Sembongi H et al. (2011): Actin and myosin contribute to mammalian mitochondrial DNA maintenance. *Nucleic Acids Res* 39, 5098-5108.

46. Kim DY, Helfman DM (2016): Loss of MLCK leads to disruption of cell-cell adhesion and invasive behavior of breast epithelial cells via increased expression of EGFR and ERK/JNK signaling. *Oncogene* 35, 4495-4508.

47. Xiong Y, Wang C, Shi L, Wang L, Zhou Z, Chen D et al. (2017): Myosin Light Chain Kinase: A Potential Target for Treatment of Inflammatory Diseases. *Front Pharmacol* 8, 292.

48. Dedio J, Konig P, Wohlfart P, Schroeder C, Kummer W, Muller-Esterl W (2001): NOSIP, a novel modulator of endothelial nitric oxide synthase activity. *FASEB J* 15, 79-89.

49. Czarny P, Wigner P, Galecki P, Sliwinski T (2018): The interplay between inflammation, oxidative stress, DNA damage, DNA repair and mitochondrial dysfunction in depression. *Prog Neuropsychopharmacol Biol Psychiatry* 80, 309-321.

50. Scally SW, Petersen J, Law SC, Dudek NL, Nel HJ, Loh KL et al. (2013): A molecular basis for the association of the HLA-DRB1 locus, citrullination, and rheumatoid arthritis. *J Exp Med* 210, 2569-2582.

51. Morgan JT, Fink GR, Bartel DP (2019): Excised linear introns regulate growth in yeast. *Nature* 565, 606-611.

52. Parenteau J, Maignon L, Berthoumieux M, Catala M, Gagnon V, Abou Elela S (2019): Introns are mediators of cell response to starvation. *Nature* 565, 612-617.

53. Hori H, Sasayama D, Teraishi T, Yamamoto N, Nakamura S, Ota M et al. (2016): Blood-based gene expression signatures of medication-free outpatients with major depressive disorder: integrative genome-wide and candidate gene analyses. *Sci Rep* 6, 18776.

54. Ikeda M, Saito T, Kanazawa T, Iwata N (2021): Polygenic risk score as clinical utility in psychiatry: a clinical viewpoint. *J Hum Genet* 66, 53-60.

55. Le Borgne M, Shaw AS (2013): Do T Cells Have a Cilium? *Science* 342, 1177-1178.

56. Calvo V, Izquierdo M (2021): Role of Actin Cytoskeleton Reorganization in Polarized Secretory Traffic at the Immunological Synapse. *Front Cell Dev Biol* 9, 629097.

57. Martin-Cofreces NB, Baixauli F, Sanchez-Madrid F (2014): Immune synapse: conductor of orchestrated organelle movement. *Trends Cell Biol* 24, 61-72.

58. Stinchcombe JC, Griffiths GM (2014): Communication, the centrosome and the immunological synapse. *Philos Trans R Soc Lond B Biol Sci* 369.

59. Tuz K, Hsiao YC, Juarez O, Shi B, Harmon EY, Phelps IG et al. (2013): The Joubert syndrome-associated missense mutation (V443D) in the Abelson-helper integration site 1 (AHI1) protein alters its localization and protein-protein interactions. *J Biol Chem* 288, 13676-13694.

60. Vilboux T, Malicdan MC, Roney JC, Cullinane AR, Stephen J, Yildirimli D et al. (2017):CELSR2, encoding a planar cell polarity protein, is a putative gene in Joubert syndrome with cortical heterotopia, microphthalmia, and growth hormone deficiency. *Am J Med Genet A* 173, 661-666.
61. Srour M, Hamdan FF, McKnight D, Davis E, Mandel H, Schwartzentruber J et al. (2015):Joubert Syndrome in French Canadians and Identification of Mutations in CEP104. *Am J Hum Genet* 97, 744-753.
62. Halbritter J, Bizet AA, Schmidts M, Porath JD, Braun DA, Gee HY et al. (2013):Defects in the IFT-B component IFT172 cause Jeune and Mainzer-Saldino syndromes in humans. *Am J Hum Genet* 93, 915-925.
63. Tory K, Lacoste T, Burglen L, Moriniere V, Boddaert N, Macher MA et al. (2007):High NPHP1 and NPHP6 mutation rate in patients with Joubert syndrome and nephronophthisis: potential epistatic effect of NPHP6 and AHI1 mutations in patients with NPHP1 mutations. *J Am Soc Nephrol* 18, 1566-1575.
64. Lambacher NJ, Bruel AL, van Dam TJ, Szymanska K, Slaats GG, Kuhns S et al. (2016):TMEM107 recruits ciliopathy proteins to subdomains of the ciliary transition zone and causes Joubert syndrome. *Nat Cell Biol* 18, 122-131.
65. Gana S, Serpieri V, Valente EM (2022):Genotype-phenotype correlates in Joubert syndrome: A review. *Am J Med Genet C Semin Med Genet* 190, 72-88.
66. Guo J, Otis JM, Suciú SK, Catalano C, Xing L, Constable S et al. (2019):Primary Cilia Signaling Promotes Axonal Tract Development and Is Disrupted in Joubert Syndrome-Related Disorders Models. *Dev Cell* 51, 759-774 e755.
67. Srivastava S, Molinari E, Raman S, Sayer JA (2017):Many Genes-One Disease? Genetics of Nephronophthisis (NPHP) and NPHP-Associated Disorders. *Front Pediatr* 5, 287.
68. Eley L, Gabrielides C, Adams M, Johnson CA, Hildebrandt F, Sayer JA (2008):Jouberin localizes to collecting ducts and interacts with nephrocystin-1. *Kidney Int* 74, 1139-1149.
69. Vasquez SSV, Dam Jv, Wheway G (2021):An updated SYSCILIA gold standard (SCGSv2) of known ciliary genes, revealing the vast progress that has been made in the cilia research field. *Molecular Biology of the Cell* 32, br13.
70. Sato DX, Kawata M (2018):Positive and balancing selection on SLC18A1 gene associated with psychiatric disorders and human-unique personality traits. *Evolution letters* 2, 499-510.
71. Sall S, Thompson W, Santos A, Dwyer DS (2021):Analysis of Major Depression Risk Genes Reveals Evolutionary Conservation, Shared Phenotypes, and Extensive Genetic Interactions. *Frontiers in psychiatry* 12, 698029.
72. Formosa LE, Mimaki M, Frazier AE, McKenzie M, Stait TL, Thorburn DR et al. (2015):Characterization of mitochondrial FOXRED1 in the assembly of respiratory chain

complex I. *Hum Mol Genet* 24, 2952-2965.

73. Zhang J, Sun W, Yan W, Kong X, Shen T, Laubach K et al. (2023):TP73 Isoform-specific disruption reveals a critical role of TAp73beta in growth suppression and inflammatory response. *Cell Death Dis* 14, 14.

74. Xie J, Li B, Yao B, Zhang P, Wang L, Lu H et al. (2020):Transforming growth factor-beta1-regulated Fas/FasL pathway activation suppresses nucleus pulposus cell apoptosis in an inflammatory environment. *Biosci Rep* 40.

75. Celus W, Di Conza G, Oliveira AI, Ehling M, Costa BM, Wenes M et al. (2017):Loss of Caveolin-1 in Metastasis-Associated Macrophages Drives Lung Metastatic Growth through Increased Angiogenesis. *Cell Rep* 21, 2842-2854.

76. Parton RG, del Pozo MA (2013):Caveolae as plasma membrane sensors, protectors and organizers. *Nat Rev Mol Cell Biol* 14, 98-112.

77. Bertero L, Gambella A, Barreca A, Osella-Abate S, Chiusa L, Francia di Celle P et al. (2022):Caveolin-1 expression predicts favourable outcome and correlates with PDGFRA mutations in gastrointestinal stromal tumours (GISTs). *Journal of clinical pathology* 75, 825-831.

78. Hwang WC, Seo SH, Kang M, Kang RH, Di Paolo G, Choi KY et al. (2021):PLD1 and PLD2 differentially regulate the balance of macrophage polarization in inflammation and tissue injury. *J Cell Physiol* 236, 5193-5211.

79. Lefort C, Roumain M, Van Hul M, Rastelli M, Manco R, Leclercq I et al. (2020):Hepatic NAPE-PLD Is a Key Regulator of Liver Lipid Metabolism. *Cells* 9.

80. Zarrow JE, Alli-Oluwafuyi AM, Youwakim CM, Kim K, Jenkins AN, Suero IC et al. (2023):Small Molecule Activation of NAPE-PLD Enhances Efferocytosis by Macrophages. *ACS Chem Biol* 18, 1891-1904.

81. You H, Ma L, Wang X, Zhang F, Han Y, Yao J et al. (2022):The emerging role of DEAD/H-box helicases in hepatitis B virus infection. *Front Cell Infect Microbiol* 12, 1062553.

82. Zan J, Xu R, Tang X, Lu M, Xie S, Cai J et al. (2020):RNA helicase DDX5 suppresses IFN-I antiviral innate immune response by interacting with PP2A-Cbeta to deactivate IRF3. *Exp Cell Res* 396, 112332.

83. Li Z, Xiao X, Ye F, Cheng Y, Mi J (2023):Upregulation of the ZWINT expression correlates with prostate cancer progression and immune infiltration. *Journal of Men's Health* 19, 65-75.

84. Zhu X, Li T, Niu X, Chen L, Ge C (2020):Identification of UBE2T as an independent prognostic biomarker for gallbladder cancer. *Oncol Lett* 20, 44.

85. Gaggini M, Ndreu R, Michelucci E, Rocchiccioli S, Vassalle C (2022):Ceramides as Mediators of Oxidative Stress and Inflammation in Cardiometabolic Disease. *Int J Mol Sci* 23.

86. Weckmann M, Bahmer T, Sand JM, Rank Ronnow S, Pech M, Vermeulen C et al. (2021):COL4A3 is degraded in allergic asthma and degradation predicts response to anti-IgE

therapy. *Eur Respir J* 58.

87. Ciechanowska A, Rojewska E, Piotrowska A, Barut J, Pawlik K, Ciapala K et al. (2022):New insights into the analgesic properties of the XCL1/XCR1 and XCL1/ITGA9 axes modulation under neuropathic pain conditions - evidence from animal studies. *Front Immunol* 13, 1058204.
88. Taminiou A, Draime A, Tys J, Lambert B, Vandeputte J, Nguyen N et al. (2016):HOXA1 binds RBCK1/HOIL-1 and TRAF2 and modulates the TNF/NF-kappaB pathway in a transcription-independent manner. *Nucleic Acids Res* 44, 7331-7349.
89. Krebs N, Klein L, Wegwitz F, Espinet E, Maurer HC, Tu M et al. (2022):Axon guidance receptor ROBO3 modulates subtype identity and prognosis via AXL-associated inflammatory network in pancreatic cancer. *JCI Insight* 7.
90. Mirakaj V, Thix CA, Laucher S, Mielke C, Morote-Garcia JC, Schmit MA et al. (2010):Netrin-1 dampens pulmonary inflammation during acute lung injury. *Am J Respir Crit Care Med* 181, 815-824.
91. Priam P, Krasteva V, Rousseau P, D'Angelo G, Gaboury L, Sauvageau G et al. (2017):SMARCD2 subunit of SWI/SNF chromatin-remodeling complexes mediates granulopoiesis through a CEBPvarepsilon dependent mechanism. *Nat Genet* 49, 753-764.
92. Witzel M, Petersheim D, Fan Y, Bahrami E, Racek T, Rohlf M et al. (2017):Chromatin-remodeling factor SMARCD2 regulates transcriptional networks controlling differentiation of neutrophil granulocytes. *Nat Genet* 49, 742-752.
93. Ahmed NS, Gatchalian J, Ho J, Burns MJ, Hah N, Wei Z et al. (2022):BRD9 regulates interferon-stimulated genes during macrophage activation via cooperation with BET protein BRD4. *Proc Natl Acad Sci U S A* 119.
94. Wang X, Wang S, Troisi EC, Howard TP, Haswell JR, Wolf BK et al. (2019):BRD9 defines a SWI/SNF sub-complex and constitutes a specific vulnerability in malignant rhabdoid tumors. *Nat Commun* 10, 1881.
95. Tanwar A, Stanley P (2023):Synergistic regulation of Notch signaling by different O-glycans promotes hematopoiesis. *Front Immunol* 14, 1097332.
96. Scharler C, Poupardin R, Ebner-Peking P, Wolf M, Schreck C, Brachtl G et al. (2022):Extra-hematopoietic immunomodulatory role of the guanine-exchange factor DOCK2. *Commun Biol* 5, 1246.
97. King R, Gallagher PJ, Khoriaty R (2022):The congenital dyserythropoietic anemias: genetics and pathophysiology. *Curr Opin Hematol* 29, 126-136.
98. Michel BC, Kadoch C (2017):A SMARCD2-containing mSWI/SNF complex is required for granulopoiesis. *Nat Genet* 49, 655-657.
99. Narayanan L, Fritzell JA, Baker SM, Liskay RM, Glazer PM (1997):Elevated levels of mutation in multiple tissues of mice deficient in the DNA mismatch repair gene Pms2. *Proc Natl*

Acad Sci U S A 94, 3122-3127.

100. Yoon SW, Lee MS, Xaver M, Zhang L, Hong SG, Kong YJ et al. (2016):Meiotic prophase roles of Rec8 in crossover recombination and chromosome structure. *Nucleic Acids Res* 44, 9296-9314.
101. Tan C, Meng L, Lv M, He X, Sha Y, Tang D et al. (2022):Bi-allelic variants in DNHD1 cause flagellar axoneme defects and asthenoteratozoospermia in humans and mice. *Am J Hum Genet* 109, 157-171.
102. Wen C, Zhou Y, Xu Y, Tan H, Pang C, Liu H et al. (2021):The Regulatory Role of GBF1 on Osteoclast Activation Through EIF2a Mediated ER Stress and Novel Marker FAM129A Induction. *Front Cell Dev Biol* 9, 706768.
103. Sebastian D, Hernandez-Alvarez MI, Segales J, Sorianello E, Munoz JP, Sala D et al. (2012):Mitofusin 2 (Mfn2) links mitochondrial and endoplasmic reticulum function with insulin signaling and is essential for normal glucose homeostasis. *Proc Natl Acad Sci U S A* 109, 5523-5528.
104. Fukunaga K, Shinoda Y, Tagashira H (2015):The role of SIGMAR1 gene mutation and mitochondrial dysfunction in amyotrophic lateral sclerosis. *J Pharmacol Sci* 127, 36-41.
105. Shanmughapriya S, Rajan S, Hoffman NE, Higgins AM, Tomar D, Nemani N et al. (2015):SPG7 Is an Essential and Conserved Component of the Mitochondrial Permeability Transition Pore. *Mol Cell* 60, 47-62.
106. Minczuk M, He J, Duch AM, Ettema TJ, Chlebowski A, Dzionek K et al. (2011):TEFM (c17orf42) is necessary for transcription of human mtDNA. *Nucleic Acids Res* 39, 4284-4299.
107. Chen R, Zeng L, Zhu S, Liu J, Zeh HJ, Kroemer G et al. (2019):cAMP metabolism controls caspase-11 inflammasome activation and pyroptosis in sepsis. *Science advances* 5, eaav5562.
108. Zhang W, Lu Y, Li X, Zhang J, Zheng L, Zhang W et al. (2018):CDCA3 promotes cell proliferation by activating the NF-kappaB/cyclin D1 signaling pathway in colorectal cancer. *Biochem Biophys Res Commun* 500, 196-203.
109. Burke SJ, Lu D, Sparer TE, Masi T, Goff MR, Karlstad MD et al. (2014):NF-kappaB and STAT1 control CXCL1 and CXCL2 gene transcription. *Am J Physiol Endocrinol Metab* 306, E131-149.
110. Ni X, Xu Y, Wang W, Kong B, Ouyang J, Chen J et al. (2022):IL-17D-induced inhibition of DDX5 expression in keratinocytes amplifies IL-36R-mediated skin inflammation. *Nat Immunol* 23, 1577-1587.
111. Feitosa MF, Wojczynski MK, North KE, Zhang Q, Province MA, Carr JJ et al. (2013):The ERLIN1-CHUK-CWF19L1 gene cluster influences liver fat deposition and hepatic inflammation in the NHLBI Family Heart Study. *Atherosclerosis* 228, 175-180.
112. Zimmerman MA, Singh N, Martin PM, Thangaraju M, Ganapathy V, Waller JL et al.



(2012):Butyrate suppresses colonic inflammation through HDAC1-dependent Fas upregulation and Fas-mediated apoptosis of T cells. *American Journal of Physiology-Gastrointestinal and Liver Physiology* 302, G1405-G1415.

113. Ramirez-Carrozzi V, Ota N, Sambandam A, Wong K, Hackney J, Martinez-Martin N et al. (2019):Cutting Edge: IL-17B Uses IL-17RA and IL-17RB to Induce Type 2 Inflammation from Human Lymphocytes. *J Immunol* 202, 1935-1941.

114. Yang J, Wang L, Huang Y, Liu K, Lu C, Si N et al. (2020):Keratin 5-Cre-driven deletion of *Ncstn* in an acne inversa-like mouse model leads to a markedly increased IL-36a and *Sprr2* expression. *Front Med* 14, 305-317.

115. Wang Y, Zhai WL, Yang YW (2020):Association between NDRG2/IL-6/STAT3 signaling pathway and diabetic retinopathy in rats. *European review for medical and pharmacological sciences* 24, 3476-3484.

116. McCullagh KJ, Calabria E, Pallafacchina G, Ciciliot S, Serrano AL, Argentini C et al. (2004):NFAT is a nerve activity sensor in skeletal muscle and controls activity-dependent myosin switching. *Proc Natl Acad Sci U S A* 101, 10590-10595.

117. Ho WJ, Law AMK, Masle-Farquhar E, Castillo LE, Mawson A, O'Bryan MK et al. (2022):Activation of the viral sensor oligoadenylate synthetase 2 (*Oas2*) prevents pregnancy-driven mammary cancer metastases. *Breast Cancer Res* 24, 31.

118. Gunes G, Conlon TM, Jeridi A, Kim R, Ertuz Z, Lang NJ et al. (2022):The arginine methyltransferase PRMT7 promotes extravasation of monocytes resulting in tissue injury in COPD. *Nat Commun* 13, 1303.

119. Console L, Scalise M, Tonazzi A, Giangregorio N, Indiveri C (2018):Characterization of Exosomal SLC22A5 (OCTN2) carnitine transporter. *Sci Rep* 8, 3758.

120. Roy M, Singh R (2021):TRIMs: selective recruitment at different steps of the NF-kappaB pathway-determinant of activation or resolution of inflammation. *Cell Mol Life Sci* 78, 6069-6086.

121. Yu Y, Li T (2021):Correlations between UBE2T Expression and Immune Infiltration in Different Cancers. 333-338.

122. Hong Y, Lee SO, Oh C, Kang K, Ryoo J, Kim D et al. (2021):USP21 Deubiquitinase Regulates AIM2 Inflammasome Activation. *J Immunol* 207, 1926-1936.

123. Langenhan T (2020):Adhesion G protein-coupled receptors-Candidate metabotropic mechanosensors and novel drug targets. *Basic Clin Pharmacol Toxicol* 126 Suppl 6, 5-16.

124. Piotrowska K, Sluczanska-Glabowska S, Kurzawski M, Dziedziejko V, Kopytko P, Paczkowska E et al. (2020):Over-Expression of Allograft Inflammatory Factor-1 (AIF-1) in Patients with Rheumatoid Arthritis. *Biomolecules* 10.

125. Fabrick BO, van Bruggen R, Deng DM, Ligtenberg AJ, Nazmi K, Schornagel K et al.



- (2009):The macrophage scavenger receptor CD163 functions as an innate immune sensor for bacteria. *Blood* 113, 887-892.
126. Taschuk F, Cherry S (2020):DEAD-Box Helicases: Sensors, Regulators, and Effectors for Antiviral Defense. *Viruses* 12.
127. Steinle H, Ellwanger K, Mirza N, Briese S, Kienes I, Pfannstiel J et al. (2021):14-3-3 and erlin proteins differentially interact with RIPK2 complexes. *J Cell Sci* 134.
128. Plun-Favreau H, Klupsch K, Moisoï N, Gandhi S, Kjaer S, Frith D et al. (2007):The mitochondrial protease HtrA2 is regulated by Parkinson's disease-associated kinase PINK1. *Nature Cell Biology* 9, 1243-1252.
129. Celli J (2012):LRSAM1, an E3 Ubiquitin ligase with a sense for bacteria. *Cell Host Microbe* 12, 735-736.
130. Asghari Adib E, Shadrach JL, Reilly-Jankowiak L, Dwivedi MK, Rogers AE, Shahzad S et al. (2024):DLK signaling in axotomized neurons triggers complement activation and loss of upstream synapses. *Cell Rep* 43, 113801.
131. May O, Yatime L, Merle NS, Delguste F, Howsam M, Daugan MV et al. (2021):The receptor for advanced glycation end products is a sensor for cell-free heme. *FEBS J* 288, 3448-3464.
132. Yoh SM, Schneider M, Seifried J, Soonthornvacharin S, Akleh RE, Olivieri KC et al. (2015):PQBP1 Is a Proximal Sensor of the cGAS-Dependent Innate Response to HIV-1. *Cell* 161, 1293-1305.
133. Figley MD, Gu W, Nanson JD, Shi Y, Sasaki Y, Cunnea K et al. (2021):SARM1 is a metabolic sensor activated by an increased NMN/NAD(+) ratio to trigger axon degeneration. *Neuron* 109, 1118-1136 e1111.
134. Donowitz M, Ming Tse C, Fuster D (2013):SLC9/NHE gene family, a plasma membrane and organellar family of Na(+)/H(+) exchangers. *Mol Aspects Med* 34, 236-251.
135. Ainbinder A, Zhao L, Glover P, Gelinas-Roa K, Rusu V, Harney A et al. (2021):Mct11 deficiency alters hepatic glucose metabolism and energy homeostasis. *bioRxiv*.
136. Juszkiwicz S, Chandrasekaran V, Lin Z, Kraatz S, Ramakrishnan V, Hegde RS (2018):ZNF598 Is a Quality Control Sensor of Collided Ribosomes. *Mol Cell* 72, 469-481 e467.
137. Matsui A, Tran M, Yoshida AC, Kikuchi SS, U M, Ogawa M et al. (2013):BTBD3 controls dendrite orientation toward active axons in mammalian neocortex. *Science* 342, 1114-1118.
138. Chen S, Li Z, Wang Y, Fan S (2022):BTN3A3 inhibits the proliferation, migration and invasion of ovarian cancer cells by regulating ERK1/2 phosphorylation. *Front Oncol* 12, 952425.
139. Woo MS, Ufer F, Sonner JK, Belkacemi A, Tintelnot J, Sáez PJ et al. (2023):Calcium channel  $\beta$ 3 subunit regulates ATP-dependent migration of dendritic cells. *Science advances* 9, eadh1653.
140. Shimazaki R, Takano S, Satoh M, Takada M, Miyahara Y, Sasaki K et al. (2021):Complement factor B regulates cellular senescence and is associated with poor prognosis in pancreatic cancer.

Cell Oncol (Dordr) 44, 937-950.

141. Mucka P, Lindemann P, Bosco B, Willenbrock M, Radetzki S, Neuenschwander M et al. (2023):CLK2 and CLK4 are regulators of DNA damage-induced NF-kappaB targeted by novel small molecule inhibitors. *Cell Chem Biol* 30, 1303-1312 e1303.

142. Xu Y, Zhou X, Gao L, Yan S, Li Z, Zhang D et al. (2023):Identification of HAGHL as a novel metabolic oncogene regulating human colorectal cancer progression. *Clin Transl Oncol* 25, 1033-1042.

143. De Andrade Costa A, Chatterjee J, Cobb O, Sanapala S, Scheaffer S, Guo X et al. (2022):RNA sequence analysis reveals ITGAL/CD11A as a stromal regulator of murine low-grade glioma growth. *Neuro Oncol* 24, 14-26.

144. Wu L, Chen P, Ying J, Zhang Q, Liu F, Lv B et al. (2019):MAT2B mediates invasion and metastasis by regulating EGFR signaling pathway in hepatocellular carcinoma. *Clin Exp Med* 19, 535-546.

145. Shi Z, Xu S, Xing S, Yao K, Zhang L, Xue L et al. (2019):Mettl17, a regulator of mitochondrial ribosomal RNA modifications, is required for the translation of mitochondrial coding genes. *FASEB J* 33, 13040-13050.

146. Giridharan SS, Rohn JL, Naslavsky N, Caplan S (2012):Differential regulation of actin microfilaments by human MICAL proteins. *J Cell Sci* 125, 614-624.

147. Sekine H, Ferreira RC, Pan-Hammarstrom Q, Graham RR, Ziemba B, de Vries SS et al. (2007):Role for Msh5 in the regulation of Ig class switch recombination. *Proc Natl Acad Sci U S A* 104, 7193-7198.

148. Maravillas-Montero JL, Lopez-Ortega O, Patino-Lopez G, Santos-Argumedo L (2014):Myosin 1g regulates cytoskeleton plasticity, cell migration, exocytosis, and endocytosis in B lymphocytes. *Eur J Immunol* 44, 877-886.

149. Wang T, Nandakumar V, Jiang XX, Jones L, Yang AG, Huang XF et al. (2013):The control of hematopoietic stem cell maintenance, self-renewal, and differentiation by Mym1-mediated epigenetic regulation. *Blood* 122, 2812-2822.

150. Zhang N, Liu S, Xu J, Ning T, Xie S, Min L et al. (2022):PGM3 regulates beta-catenin activity to promote colorectal cancer cell progression. *Exp Biol Med (Maywood)* 247, 1518-1528.

151. Lehman N, Di Fulvio M, McCray N, Campos I, Tabatabaian F, Gomez-Cambronero J (2006):Phagocyte cell migration is mediated by phospholipases PLD1 and PLD2. *Blood* 108, 3564-3572.

152. Li C, Li SZ, Huang XC, Chen J, Liu W, Zhang XD et al. (2021):PTPN18 promotes colorectal cancer progression by regulating the c-MYC-CDK4 axis. *Genes Dis* 8, 838-848.

153. Huang H, Ouyang Q, Mei K, Liu T, Sun Q, Liu W et al. (2023):Acetylation of SCFD1 regulates SNARE complex formation and autophagosome-lysosome fusion. *Autophagy* 19, 189-

203.

154. Hatsuzawa K, Sakurai C (2020):Regulatory Mechanism of SNAP23 in Phagosome Formation and Maturation. *Yonago Acta Med* 63, 135-145.

155. Torres JZ, Summers MK, Peterson D, Brauer MJ, Lee J, Senese S et al. (2011):The STARD9/Kif16a kinesin associates with mitotic microtubules and regulates spindle pole assembly. *Cell* 147, 1309-1323.

156. Zhao X, Chen Q, Cai Y, Chen D, Bei M, Dong H et al. (2021):TRA2A Binds With LncRNA MALAT1 To Promote Esophageal Cancer Progression By Regulating EZH2/beta-catenin Pathway. *J Cancer* 12, 4883-4890.

**(A) (i)**

| sample ID     | Individual ID | sex | age | BDI-II score          |                      |
|---------------|---------------|-----|-----|-----------------------|----------------------|
|               |               |     |     | before medicine (BMT) | after medicine (AMT) |
| CON-1         | COI04         | M   | 40s | 7                     | -                    |
| CON-2         | COI20         | M   | 40s | 7                     | -                    |
| CON-3         | COI23         | F   | 20s | 9                     | -                    |
| CON-4         | COI06         | F   | 40s | 13                    | -                    |
| CON-5         | COI07         | M   | 40s | 16                    | -                    |
| CON-6         | COI21         | M   | 30s | 16                    | -                    |
| BMT-1 & AMT-1 | COI08         | F   | 30s | 17                    | 6                    |
| BMT-2 & AMT-2 | COI18         | F   | 40s | 18                    | 8                    |
| BMT-3 & AMT-3 | COI22         | F   | 20s | 21                    | 12                   |
| BMT-4 & AMT-4 | COI02         | M   | 30s | 22                    | 21                   |
| BMT-5 & AMT-5 | COI01         | F   | 50s | 23                    | 11                   |
| BMT-6 & AMT-6 | COI12         | M   | 30s | 25                    | 9                    |
| BMT-7 & AMT-7 | COI14         | M   | 50s | 27                    | 0                    |
| BMT-8 & AMT-8 | COI19         | F   | 30s | 27                    | 18                   |

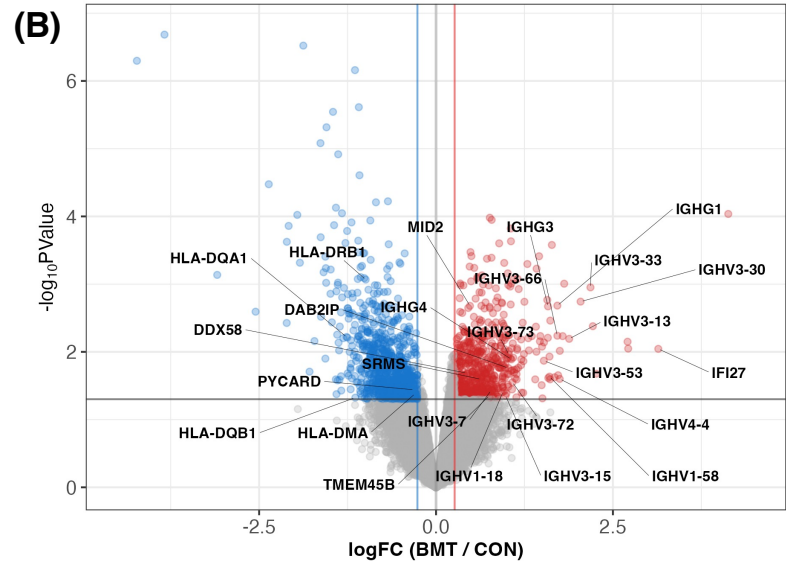

**(ii)**

|                                    | CON          | BMT          | AMT          |
|------------------------------------|--------------|--------------|--------------|
| N                                  | 6            | 8            |              |
| gender                             | M4 : F2      | M3 : F5      |              |
| Age at the 1st medical examination | 40.67 ± 6.52 | 40.38 ± 9.04 |              |
| BDI-II score                       | 11.33 ± 3.86 | 22.50 ± 3.54 | 10.63 ± 6.20 |

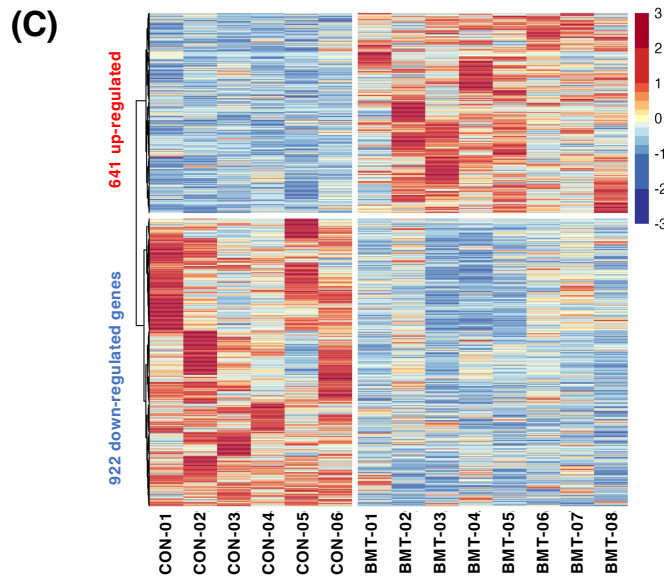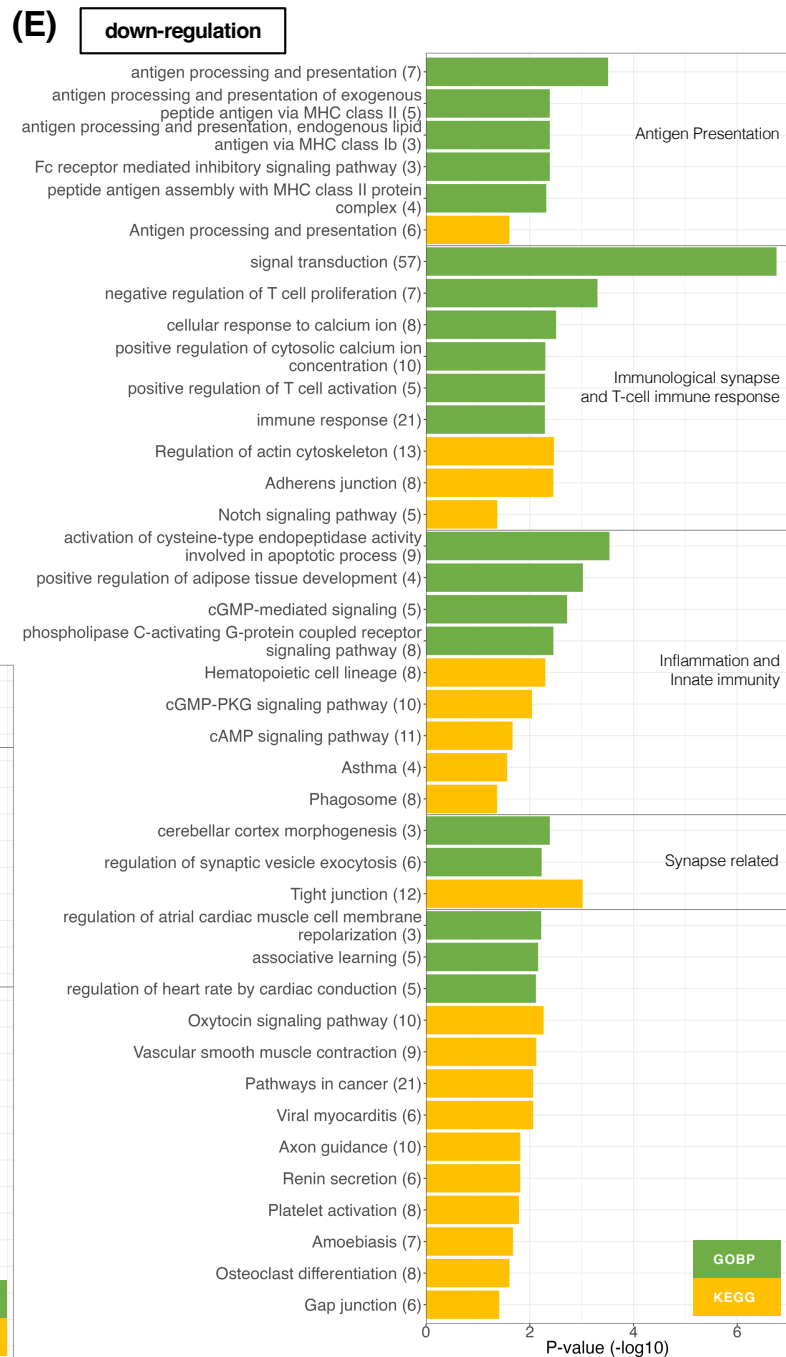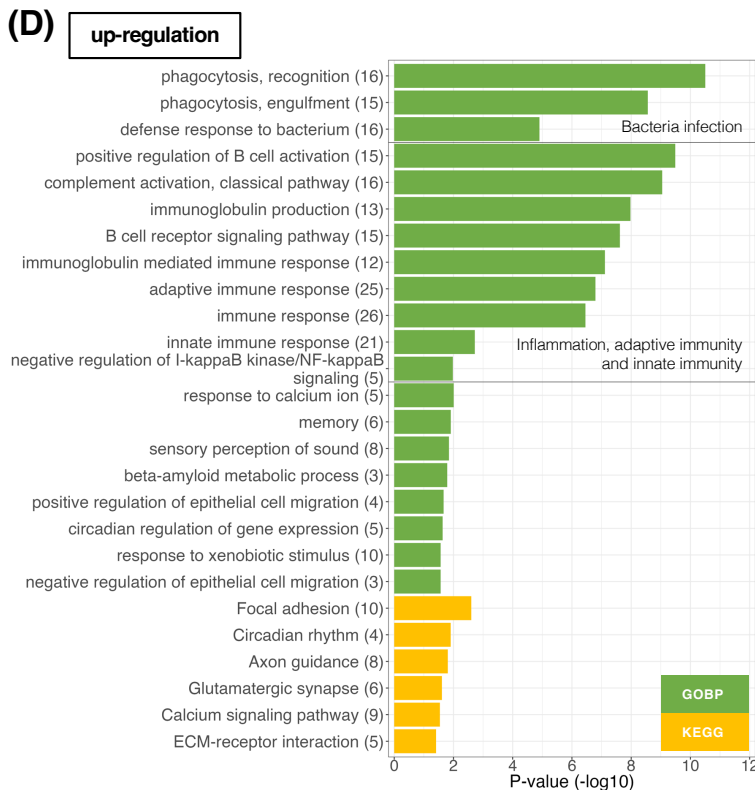

**Fig.1**

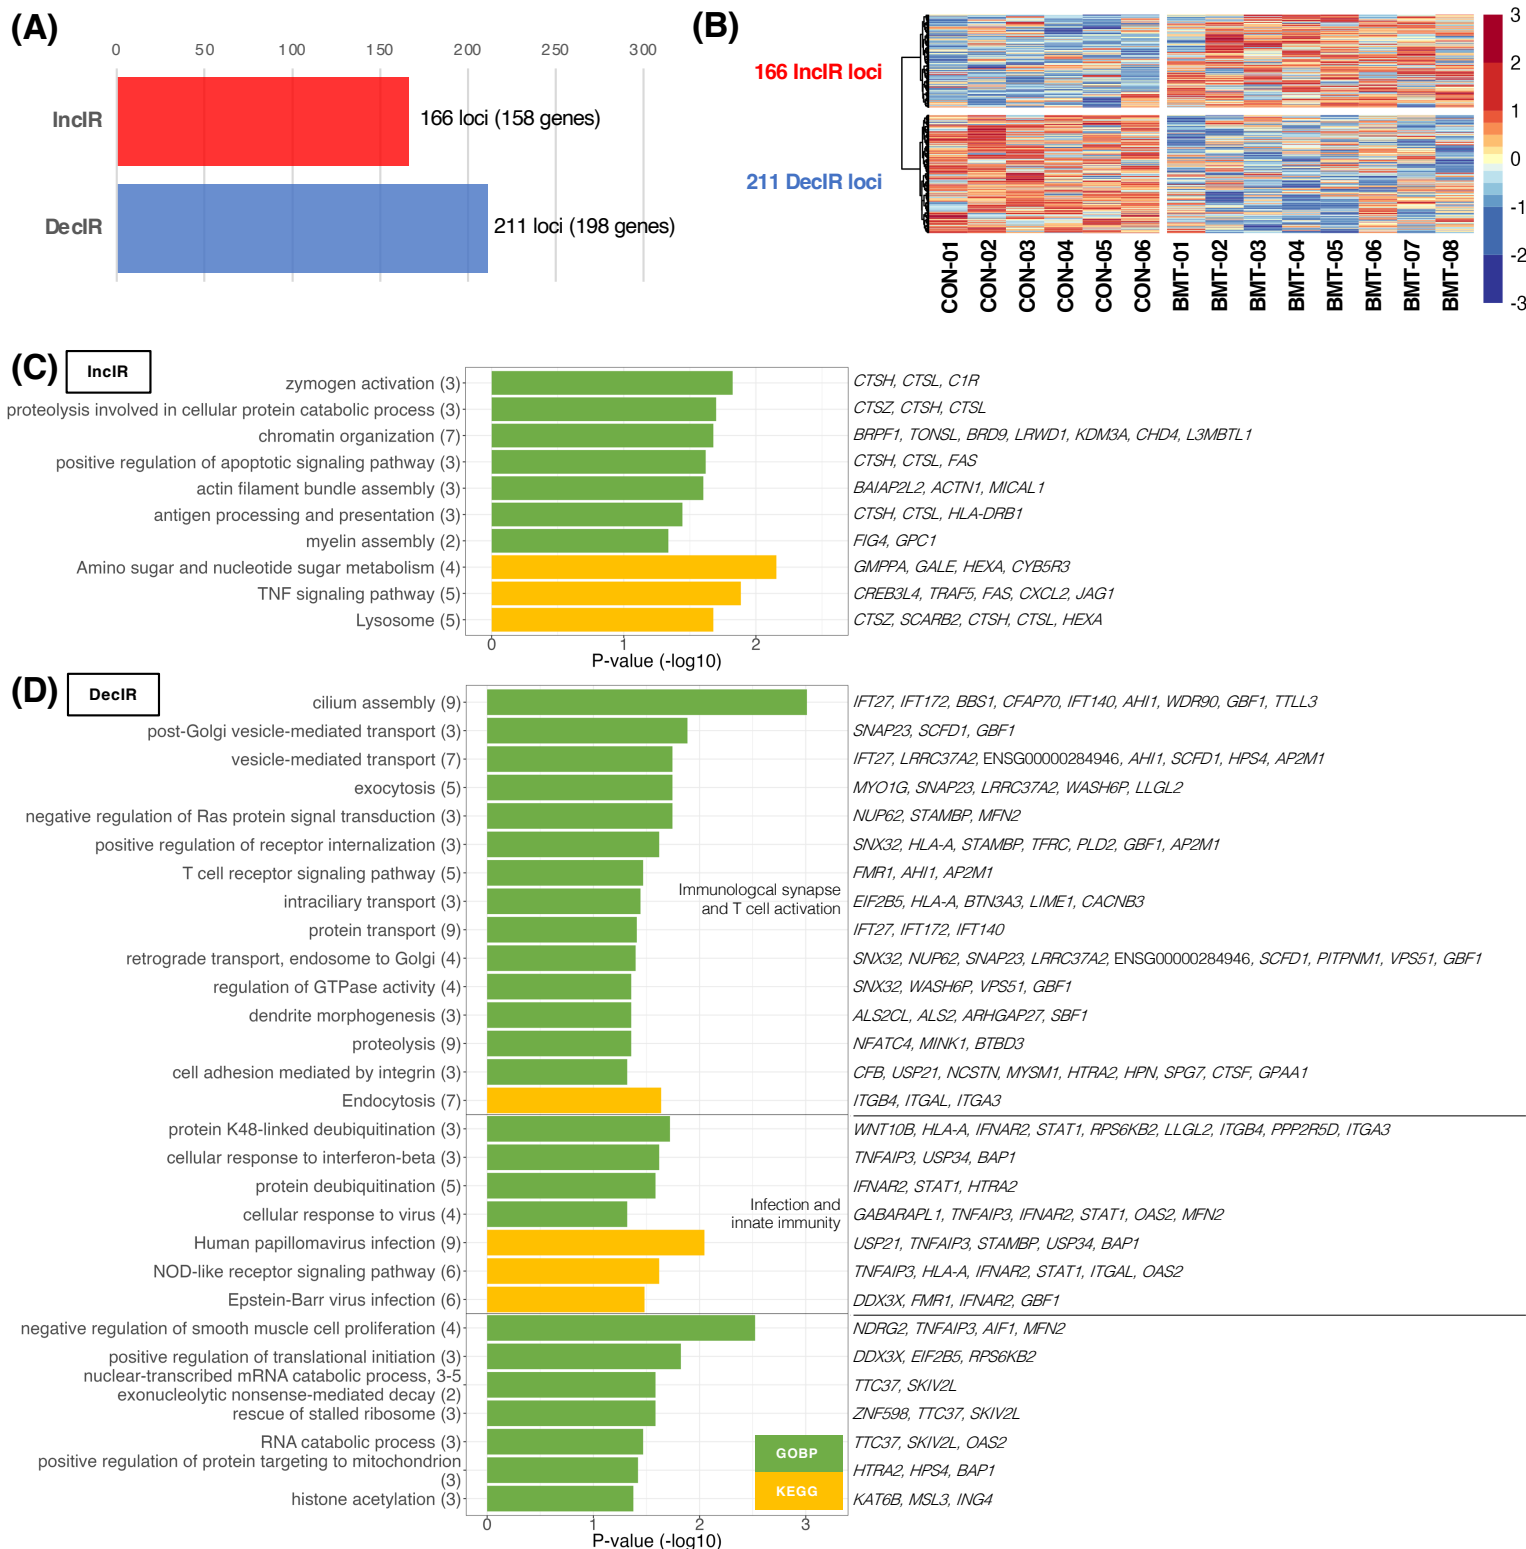

Fig.2



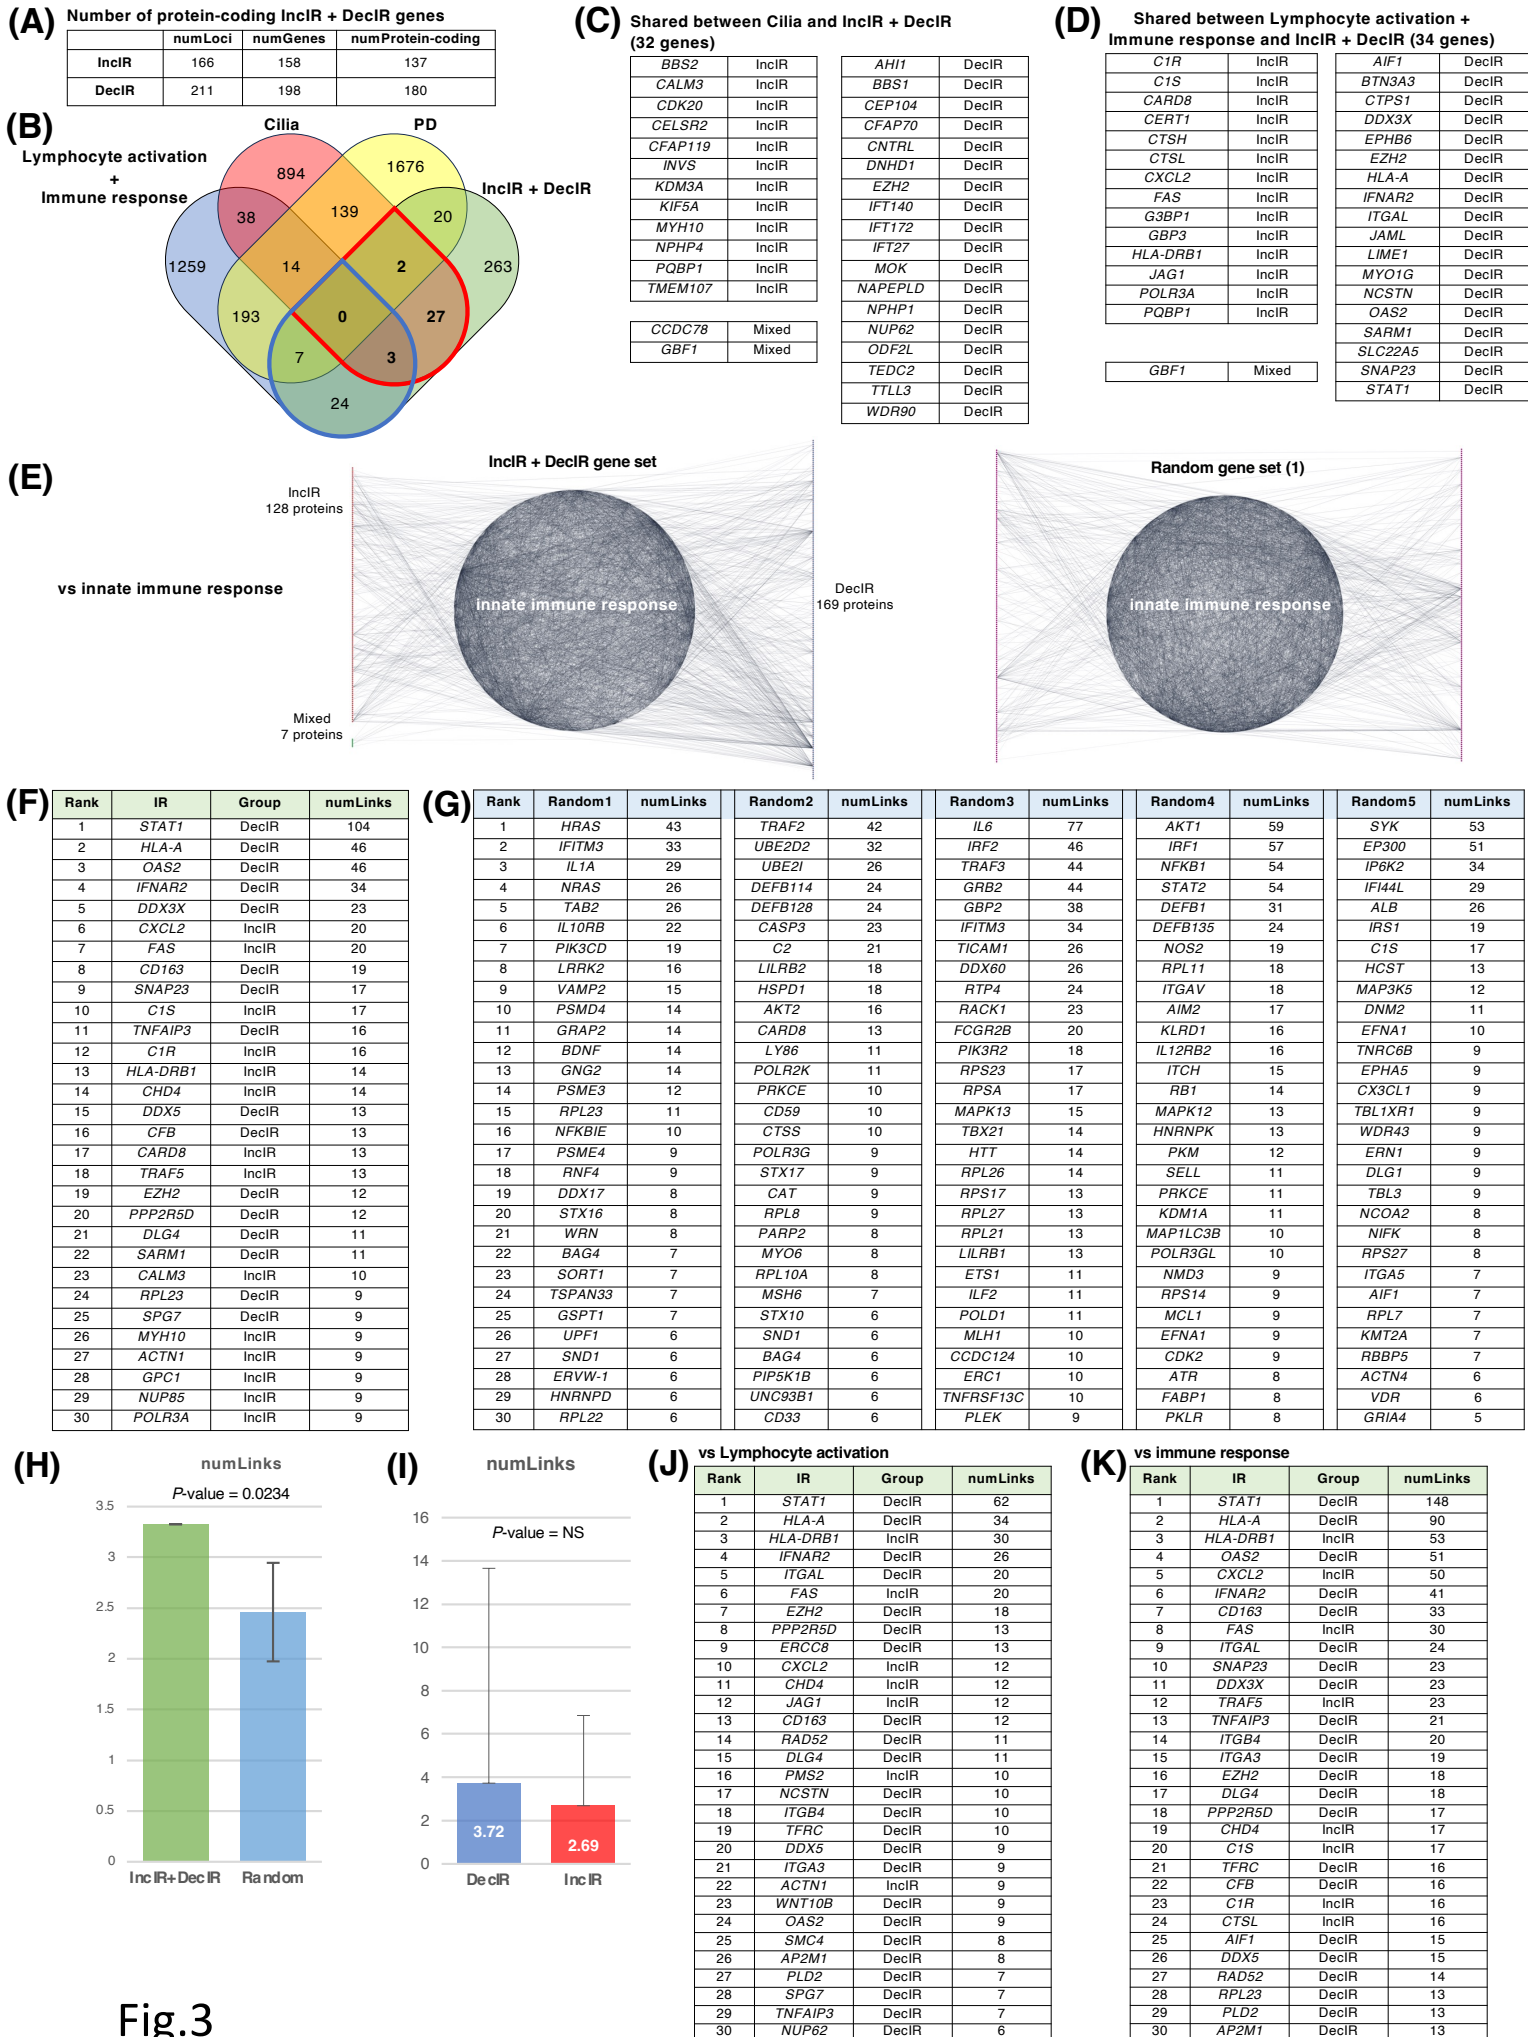

Fig.3

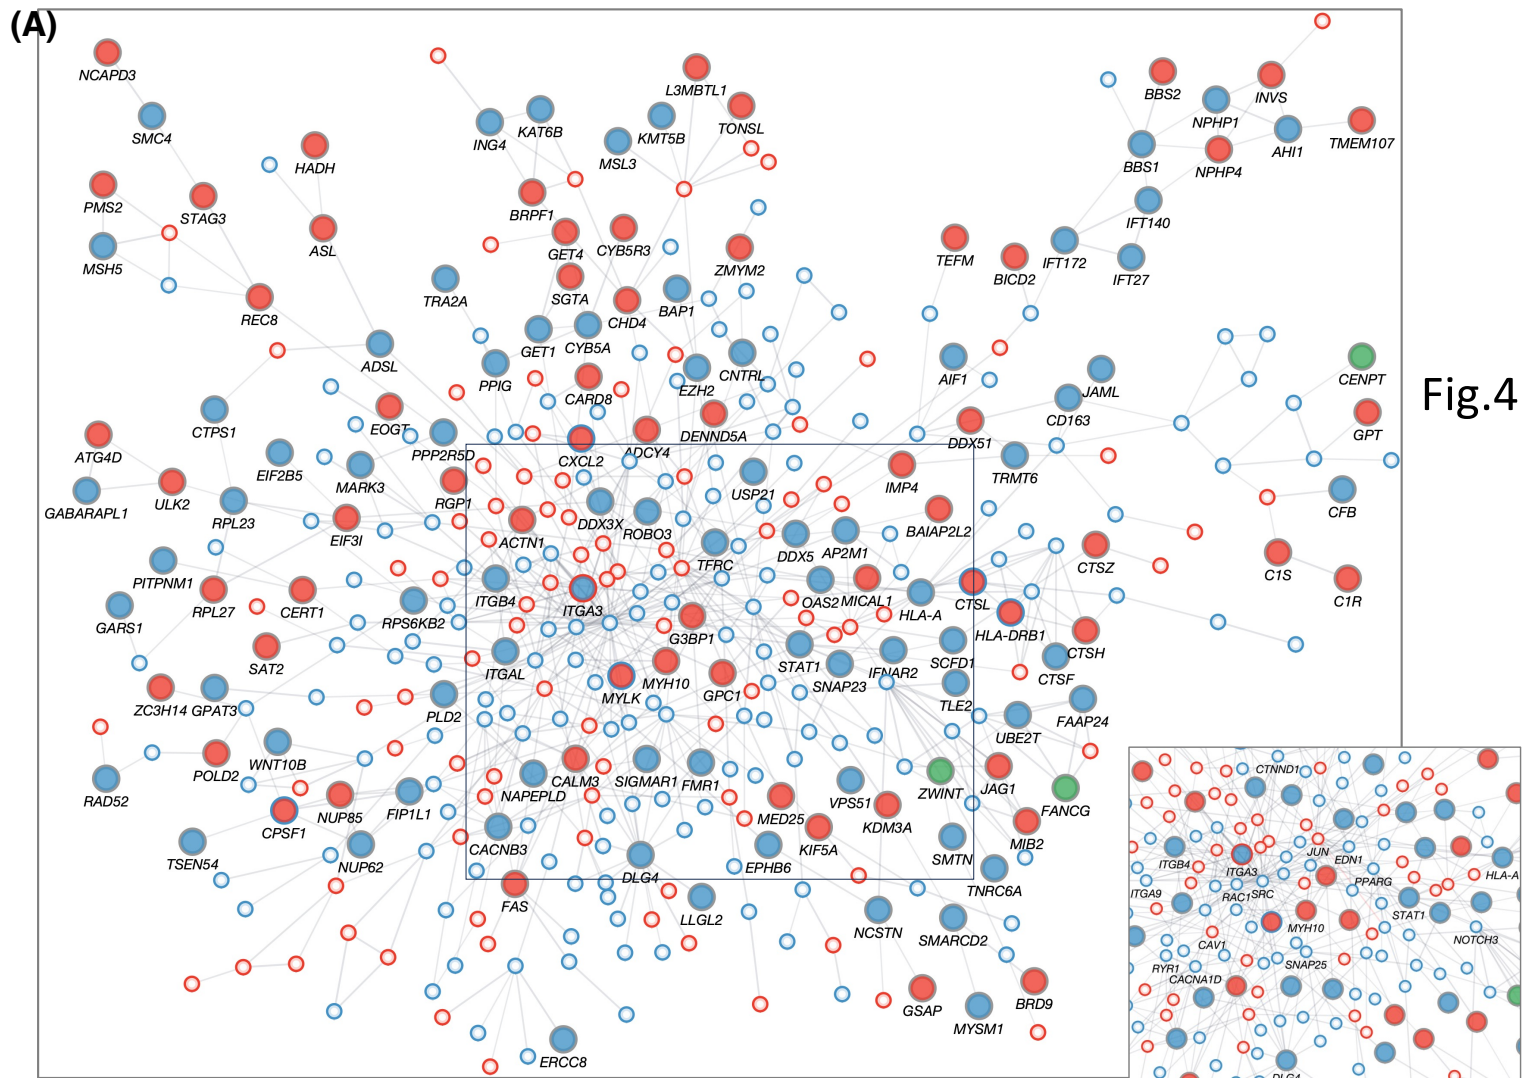

**(B)**

| symbol         | numLinks | IR               | DEG             |
|----------------|----------|------------------|-----------------|
| <i>SRC</i>     | 43       |                  | down-regulation |
| <i>RAC1</i>    | 25       |                  | down-regulation |
| <i>DLG4</i>    | 18       | DeclR            |                 |
| <i>CAV1</i>    | 16       |                  | up-regulation   |
| <i>JUN</i>     | 16       |                  | up-regulation   |
| <i>CTNND1</i>  | 15       |                  | down-regulation |
| <i>SNAP25</i>  | 15       |                  | down-regulation |
| <i>STAT1</i>   | 14       | DeclR            |                 |
| <i>ITGB4</i>   | 13       | DeclR            |                 |
| <i>PPARG</i>   | 13       |                  | down-regulation |
| <i>CACNA1D</i> | 12       |                  | down-regulation |
| <i>HLA-A</i>   | 12       | DeclR            |                 |
| <i>EDN1</i>    | 11       |                  | down-regulation |
| <i>ITGA3</i>   | 11       | DeclR            | up-regulation   |
| <i>MYH10</i>   | 11       | InclR (recovery) |                 |
| <i>ITGA9</i>   | 10       |                  | down-regulation |
| <i>NOTCH3</i>  | 10       |                  | down-regulation |
| <i>RYR1</i>    | 10       |                  | down-regulation |

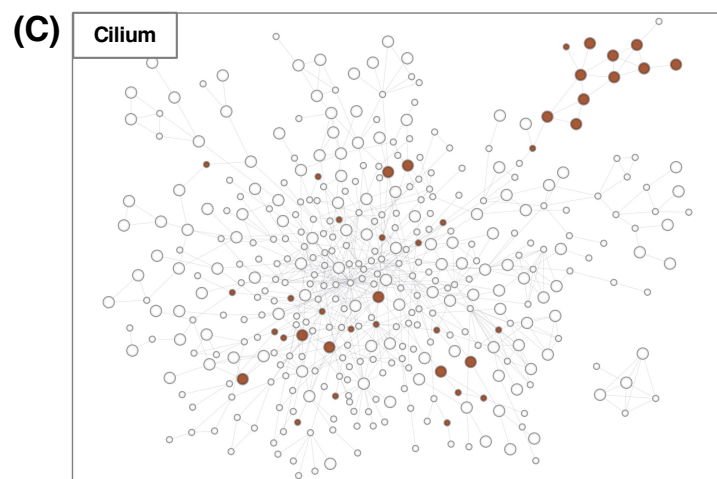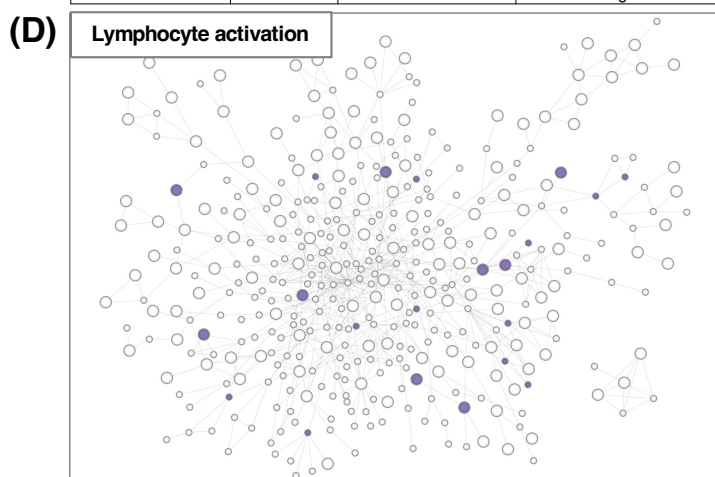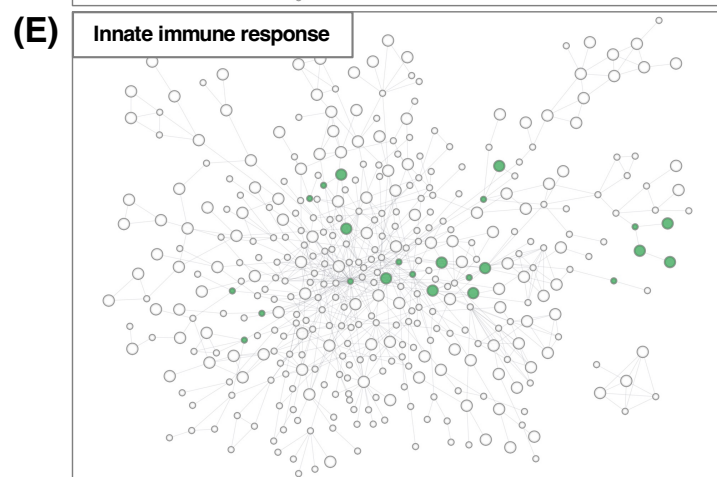



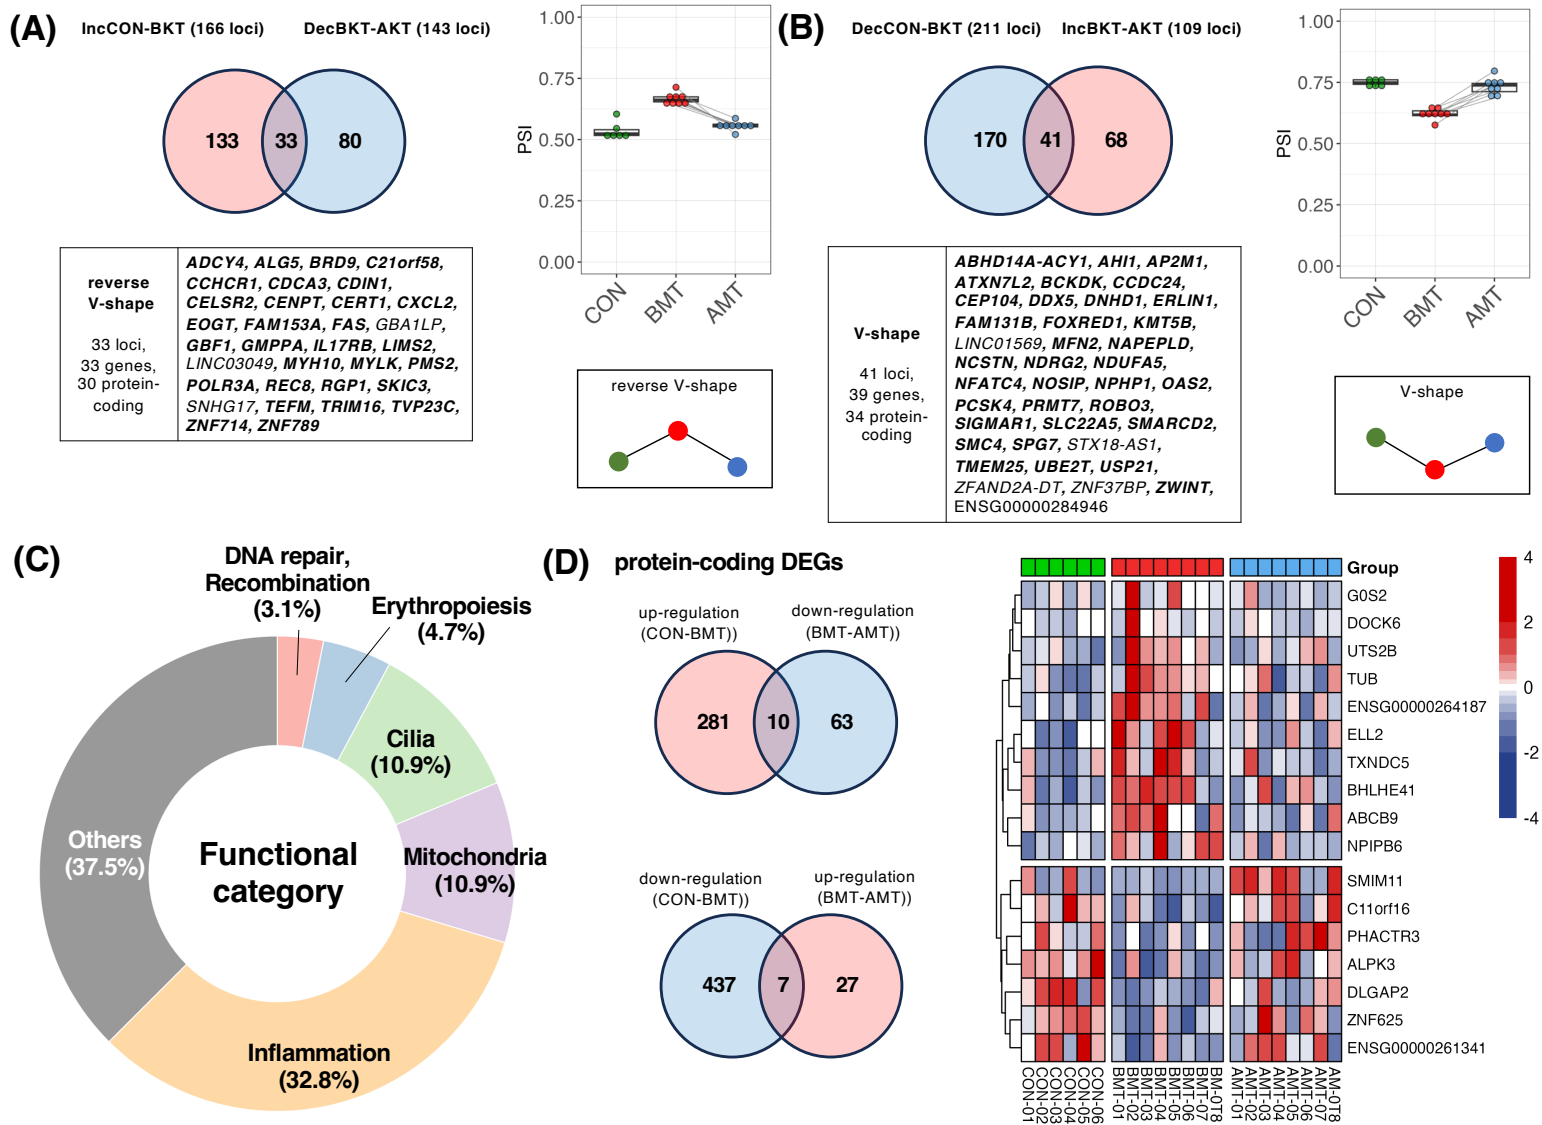

**Fig.5**

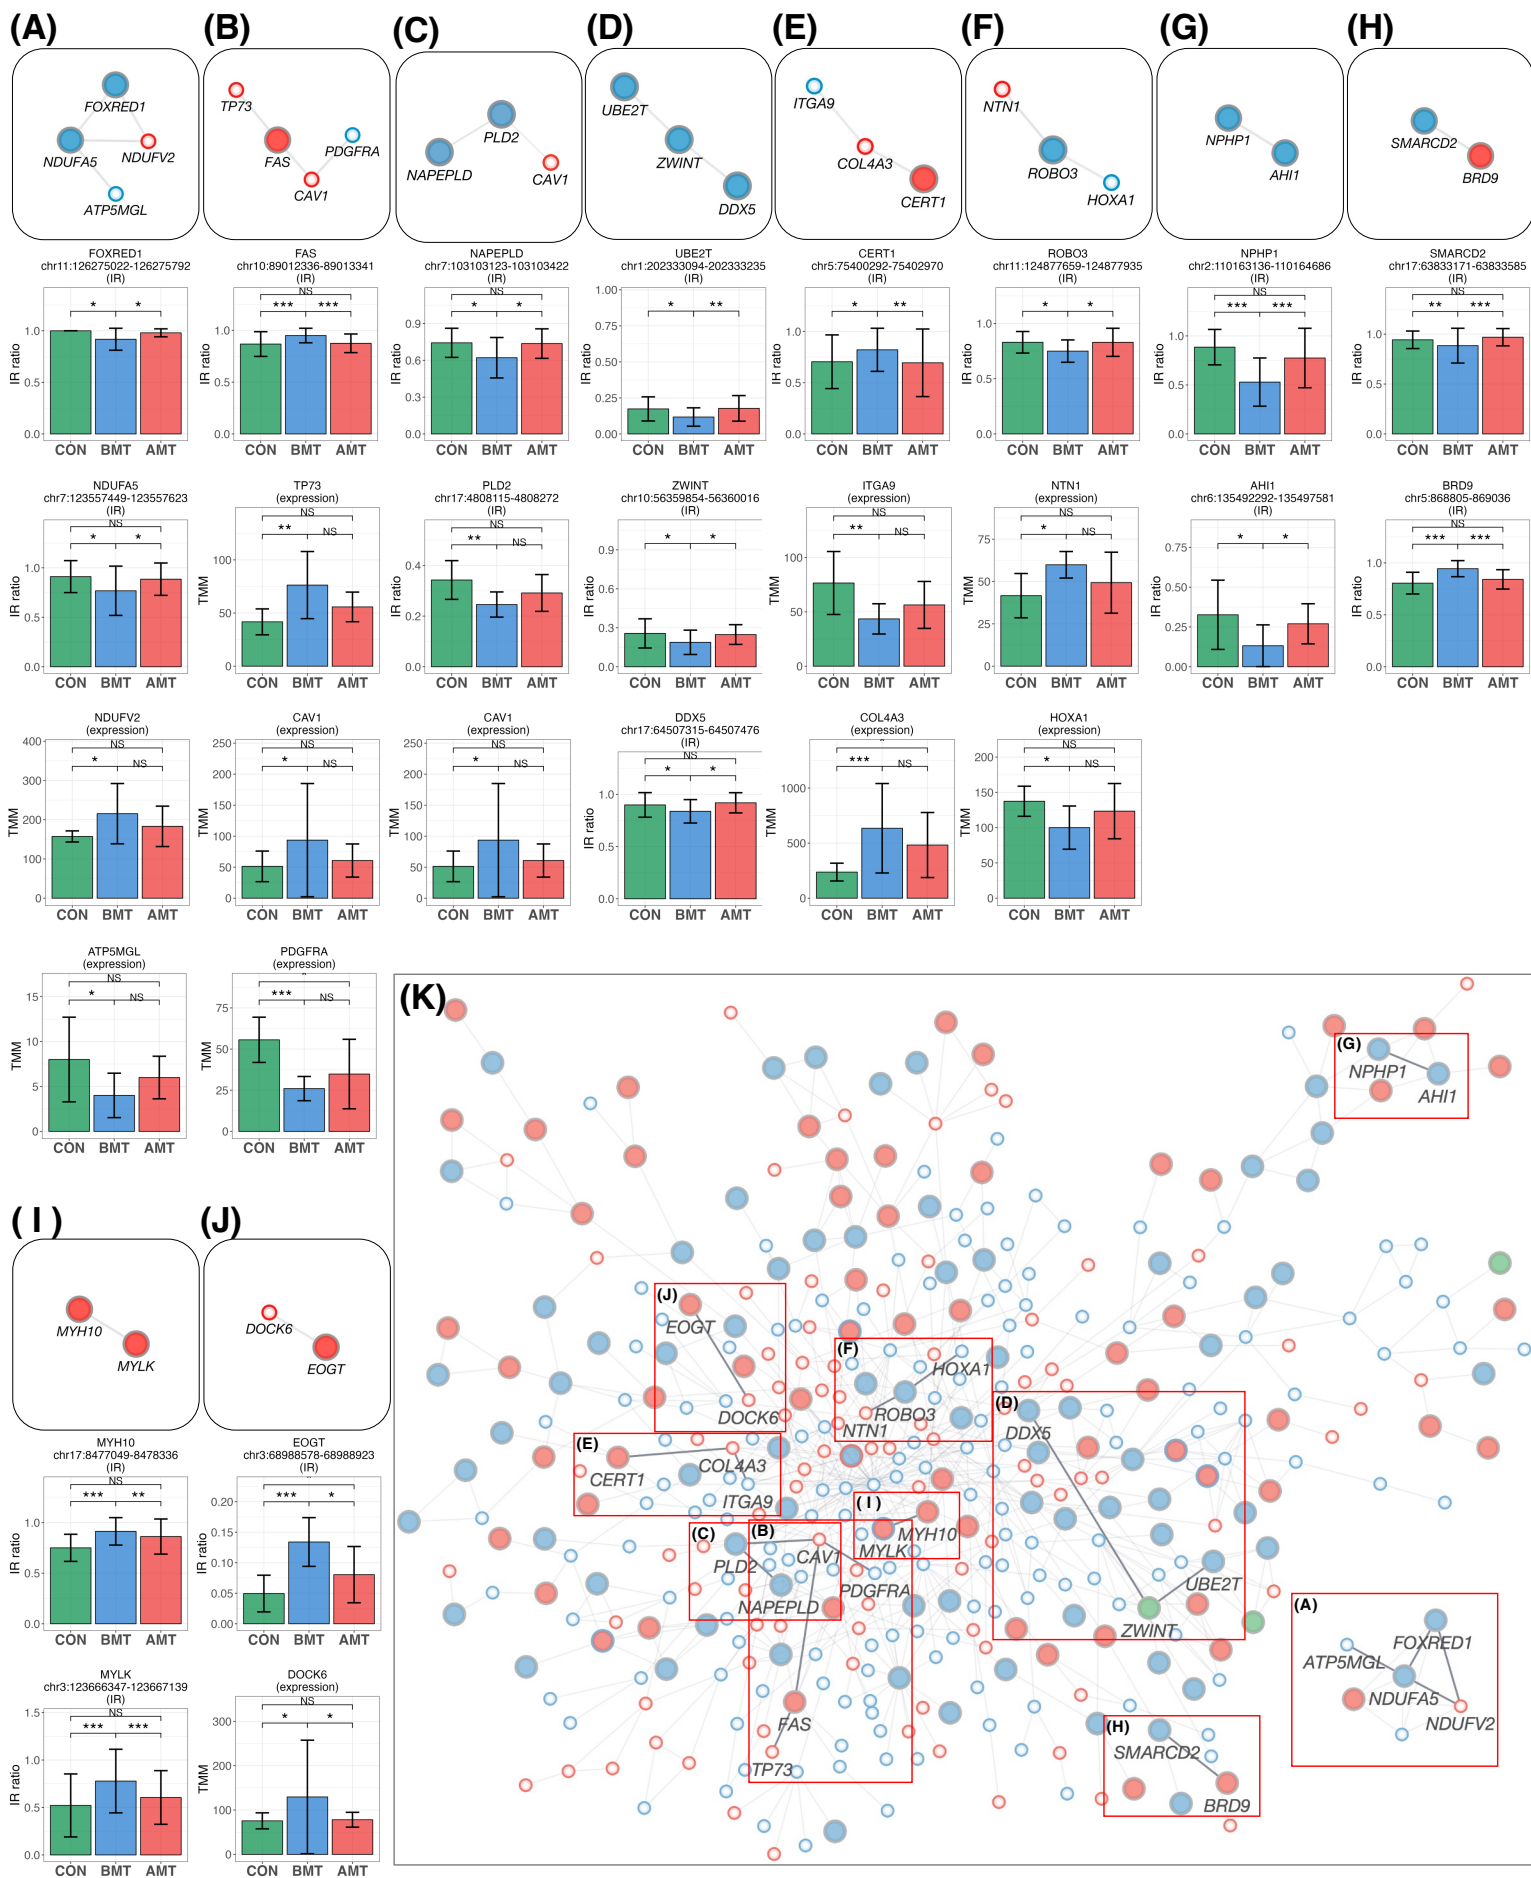

Fig. 6
